# Supplementary material for: Implementation of a virtual international cardiology curriculum to address the deficit of cardiovascular education in Haiti: a pilot study
Source: PubMed Central journal article supplement — BMJ Open. 2021 Jun 21;11(6):e048690. doi: 10.1136/bmjopen-2021-048690 (PMC8217944; doi:10.1136/bmjopen-2021-048690), 2021-06-21
Supplement: bmjopen-2021-048690.draft_revisions.pdf [file bmjopen-2021-048690.draft_revisions.pdf]

# BMJ Open

BMJ Open is committed to open peer review. As part of this commitment we make the peer review history of every article we publish publicly available.

When an article is published we post the peer reviewers' comments and the authors' responses online. We also post the versions of the paper that were used during peer review. These are the versions that the peer review comments apply to.

The versions of the paper that follow are the versions that were submitted during the peer review process. They are not the versions of record or the final published versions. They should not be cited or distributed as the published version of this manuscript.

BMJ Open is an open access journal and the full, final, typeset and author-corrected version of record of the manuscript is available on our site with no access controls, subscription charges or pay-per-view fees (<http://bmjopen.bmj.com>).

If you have any questions on BMJ Open's open peer review process please email [info.bmjopen@bmj.com](mailto:info.bmjopen@bmj.com)

# BMJ Open

## An Adaptive International Cardiology Curriculum Accessible by Remote Distance Learning: The Haiti Experience (iCARDS-Haiti)

|                               |                                                                                                                                                                                                                                                                                                                                                                                                                                                                                                                                                                                                                                                                                                                                                                                 |
|-------------------------------|---------------------------------------------------------------------------------------------------------------------------------------------------------------------------------------------------------------------------------------------------------------------------------------------------------------------------------------------------------------------------------------------------------------------------------------------------------------------------------------------------------------------------------------------------------------------------------------------------------------------------------------------------------------------------------------------------------------------------------------------------------------------------------|
| Journal:                      | <i>BMJ Open</i>                                                                                                                                                                                                                                                                                                                                                                                                                                                                                                                                                                                                                                                                                                                                                                 |
| Manuscript ID                 | bmjopen-2021-048690                                                                                                                                                                                                                                                                                                                                                                                                                                                                                                                                                                                                                                                                                                                                                             |
| Article Type:                 | Original research                                                                                                                                                                                                                                                                                                                                                                                                                                                                                                                                                                                                                                                                                                                                                               |
| Date Submitted by the Author: | 04-Jan-2021                                                                                                                                                                                                                                                                                                                                                                                                                                                                                                                                                                                                                                                                                                                                                                     |
| Complete List of Authors:     | Haynes, Norrisa; University of Pennsylvania, Cardiology<br>Saint-Joy, Veauthyelau ; Centre Hospitalier d Antibes Juan les Pins, Cardiology<br>Swain , JaBaris; University of Pennsylvania, Cardiovascular Surgery<br>Ezekwesili, Agnes; University of Pennsylvania Perelman School of Medicine<br>Dawson , Calixte; Hôpital Universitaire de Mirebalais, Internal Medicine<br>Vernet, Fritz; Hôpital Universitaire de Mirebalais, Internal Medicine<br>Laneau, Davidson; Hôpital Universitaire de Mirebalais, Internal Medicine<br>Tierney, Ann; University of Pennsylvania, Center for Clinical Epidemiology and Biostatistics<br>Shea, Judy ; University of Pennsylvania, Division of General Internal Medicine<br>Ambrose , Marietta; University of Pennsylvania, Cardiology |
| Keywords:                     | MEDICAL EDUCATION & TRAINING, CARDIOLOGY, PUBLIC HEALTH                                                                                                                                                                                                                                                                                                                                                                                                                                                                                                                                                                                                                                                                                                                         |
|                               |                                                                                                                                                                                                                                                                                                                                                                                                                                                                                                                                                                                                                                                                                                                                                                                 |

SCHOLARONE™  
Manuscripts

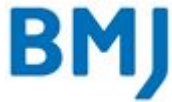

I, the Submitting Author has the right to grant and does grant on behalf of all authors of the Work (as defined in the below author licence), an exclusive licence and/or a non-exclusive licence for contributions from authors who are: i) UK Crown employees; ii) where BMJ has agreed a CC-BY licence shall apply, and/or iii) in accordance with the terms applicable for US Federal Government officers or employees acting as part of their official duties; on a worldwide, perpetual, irrevocable, royalty-free basis to BMJ Publishing Group Ltd ("BMJ") its licensees and where the relevant Journal is co-owned by BMJ to the co-owners of the Journal, to publish the Work in this journal and any other BMJ products and to exploit all rights, as set out in our [licence](#).

The Submitting Author accepts and understands that any supply made under these terms is made by BMJ to the Submitting Author unless you are acting as an employee on behalf of your employer or a postgraduate student of an affiliated institution which is paying any applicable article publishing charge ("APC") for Open Access articles. Where the Submitting Author wishes to make the Work available on an Open Access basis (and intends to pay the relevant APC), the terms of reuse of such Open Access shall be governed by a Creative Commons licence – details of these licences and which [Creative Commons](#) licence will apply to this Work are set out in our licence referred to above.

Other than as permitted in any relevant BMJ Author's Self Archiving Policies, I confirm this Work has not been accepted for publication elsewhere, is not being considered for publication elsewhere and does not duplicate material already published. I confirm all authors consent to publication of this Work and authorise the granting of this licence.

## An Adaptive International Cardiology Curriculum Accessible by Remote Distance Learning: The Haiti Experience (ICARDs-Haiti)

Norrisa Haynes, MD MPH<sup>1</sup>; Veauthyelau Saint-Joy, MD<sup>2</sup>; JaBaris Swain, MD MPH<sup>3</sup>; Agnes C. Ezekwesili, BSPH<sup>4</sup>; Fritz Verly Vernet, MD<sup>5\*</sup>; Calixte Dawson, MD<sup>5</sup>; Davidson Laneau, MD<sup>5</sup>; Ann Tierney, MS<sup>6</sup>, Judy A. Shea, PhD<sup>7</sup>, Marietta Ambrose, MD MPH MEd<sup>1</sup>

1Division of Cardiology, University of Pennsylvania, Philadelphia PA: 2 Department of Cardiology, Centre Hospitalier d'Antibes Juan-les-Pins, France: 3Division of Cardiovascular Surgery, University of Pennsylvania, Philadelphia PA: 4Perelman School of Medicine at the University of Pennsylvania: 5Department of Medicine, Hôpital Universitaire de Mirebalais, Mirebalais Haiti: 6Center for Clinical Epidemiology and Biostatistics, University of Pennsylvania, Philadelphia: 7Division of General Internal Medicine, University of Pennsylvania, Philadelphia PA

**Word Count:** 3638

**Acknowledgements:** Special thank you to the internal medicine residents at Hôpital Universitaire de Mirebalais, Dr. Jean-Pierre Brisma, Zanmi Lasante, Dr. Merly Robert, Dr. Gene Kwan, UPenn cardiology fellows, Dr. Garly Saint-Croix, Dr. Michel Ibrahim, Dr. Benedicte LeFevre, Dr. Anne Christine Buteau, Dr. Krystal Hill, Dr. Rodcnel Sainvilien, Dr. Frank Silvestry, Dr. Paul Mather, Dr. Victor Ferrari, Dr. Mahesh Vidula, Dr. Sri Adusumalli, Denice Susini, Jennifer Cronin, and funding from the Penn Cardiovascular Disease Fellowship Innovation Fund

### **Author contributions:**

N.H., V.S.J., conceived and planned the study. N.H., V.S.J., F.V.V., C.D., D.L., and M.A., carried out the study. N.H., V.S.J., performed data collection. A.T., N.H., V.S.J., J.B., M.A., J.A.S., performed data analysis and interpretation. N.H., J.B., V.S.J., drafted the manuscript. M.A., J.S.A., A.E., performed critical revision of the article. N.H., V.S.J., J.B., A.E., F.V.V., C.D., D.L., A.T., J.A.S., and M.A., approved the article to be published.

**Funding:** The Penn Cardiovascular Disease Fellowship Innovation fund provided funding for statistical support.

**Disclosures:** There are no relationships with industry to report. All authors have nothing to disclose

### **Address for Correspondence:**

Norrisa Haynes, MD MPH  
Hospital of the University of Pennsylvania  
3400 Spruce Street, Philadelphia PA 19104

1  
2  
3 Phone: (267) 271-7317, Fax: (215) 349-8190

4 [Norrisa.Haynes@pennmedicine.upenn.edu](mailto:Norrisa.Haynes@pennmedicine.upenn.edu)

5 Twitter: @NorrisaHaynes  
6  
7  
8  
9

### 10 **Abstract:**

11 **Background:** Cardiovascular disease (CVD) remains a leading cause of morbidity and mortality worldwide,  
12 conferring a disparate burden on low and middle-income countries (LMICs). Haiti represents a resource-  
13 constrained setting, limited by a paucity of resources and trained cardiovascular professionals equipped  
14 to address the increasing burden of CVD.  
15

16  
17 **Objective:** Here we describe the creation of a comprehensive cardiology curriculum delivered through a  
18 virtual classroom. The curriculum was created to give local providers in low resource settings such as Haiti  
19 the skills necessary to provide the best possible care with locally available resources.  
20

21 **Methods:** Over one academic year (May 2019-2020), ICARDs-Haiti consisted of biweekly live-streamed,  
22 synchronous didactic lectures, seminars and case presentations broadcast to 16 internal medicine (IM)  
23 residents at Hôpital Universitaire de Mirebalais (HUM), 1 of only 4 IM training programs in Haiti. The  
24 virtual classroom was created using commercially available video conferencing and data-sharing  
25 platforms. Pre- and post-lecture surveys and an end of the year survey were administered to assess the  
26 impact of the curriculum.  
27  
28

29 **Results:** Analysis of participant performance revealed that the majority of the curriculum was associated  
30 with moderate to large improvement as seen in effect sizes. Based on the end of the year evaluation,  
31 participants reported that the curriculum was educational and relevant to medical practice in Haiti.  
32 Additionally, it helped to maintain educational opportunities for trainees during the COVID-19 pandemic.  
33

34 **Conclusion:** This medical education pilot study demonstrates the feasibility of augmenting cardiology  
35 education in LMICs by creating a virtual curriculum made possible by local partnerships, internet access,  
36 and technology.  
37  
38

### 39 **Article Summary:**

#### 40 **Strengths:**

- 41 • To our knowledge, this study is the first to describe and present data in support of the utilization  
42 of an international cardiology curriculum and virtual cardiology education program in low  
43 resource settings such as Haiti to supplement onsite global health educational endeavors.
- 44 • This study demonstrated that the majority of the curriculum was associated with moderate to  
45 large improvement in participant performance as seen in effect sizes.
- 46 • This study demonstrated that the curriculum was relevant to clinical practice in Haiti and enabled  
47 education to continue despite travel restrictions and social distancing imposed due to the COVID-  
48 19 pandemic. Additionally, this study highlights the grassroots nature of the ICARDs-Haiti virtual  
49 curriculum and enables young researchers early in their careers and physicians from LMICs such  
50 as Haiti to engage scholarship.  
51

#### 52 **Limitations of the study:**

- 53 • One limitation of the study is the small sample size.
- 54 • Given the use of immediate post lecture assessments, the impact on long-term knowledge  
55 retention is unclear.  
56  
57  
58  
59  
60

1  
2  
3  
4  
5  
6  
7  
8 **Keywords:** *Haiti, international cardiology curriculum, global health, distance learning*

9  
10 **Introduction:**

11 While this decade has seen an overall decline in premature morbidity and mortality from communicable  
12 diseases, substantial progress has been offset by a steady rise in non-communicable diseases (NCDs). Of  
13 these, cardiovascular disease (CVD) has become the single most critical source of NCD deaths worldwide.<sup>1</sup>  
14 In 2012, the World Health Organization (WHO) estimated that 17.6 million people died of CVD globally,  
15 with a disproportionate burden of deaths falling on low and middle-income countries (LMICs).<sup>2</sup> With over  
16 80% of cardiovascular deaths occurring in LMICs, proportionally, this disparity accounts for an estimated  
17 31.3% of global mortality.<sup>3</sup> The alarming increase in the global burden of CVD and associated risk factors  
18 provide a compelling argument in support of prioritizing urgent yet carefully planned efforts to prevent  
19 and control this global epidemic, especially in LMICs. It is unlikely, however, that low-income countries,  
20 such as Haiti, can overcome this tremendous burden without expanding their skilled human resources,  
21 healthcare infrastructure and medical education.  
22  
23

24 In Haiti, CVD accounts for 29% of all deaths.<sup>4</sup> The incidence of peripartum cardiomyopathy is one of the  
25 highest in the world at a rate of 1 in every 300 deliveries.<sup>5</sup> Haiti also has a relatively high prevalence of  
26 rheumatic heart disease (RHD) at 5% in rural settings and a high prevalence of hypertensive  
27 cardiomyopathy and stroke.<sup>6,7</sup> Untreated hypertension and diabetes are most commonly implicated as  
28 the cause of the aforementioned conditions. There is also a lack of cardiovascular healthcare  
29 infrastructure in Haiti. Although most hospitals have access to EKG machines, there are no catheterization  
30 laboratories in the country. Acute coronary syndromes (ACS) are typically managed medically. There is  
31 limited access to cardiac surgery through non-governmental organizations (NGOs). Additionally, due to a  
32 lack of trained professionals, few hospitals routinely use echocardiography despite its high diagnostic  
33 value.  
34  
35

36  
37 Currently, there are only 25 physicians per 100,000 people, 6.5 healthcare providers per 10,000 people  
38 (including nurses) and an estimated 16 cardiologists countrywide for a population of over 11 million  
39 people.<sup>8,7,9</sup> The ability to obtain advanced medical training after medical school is limited. Upon graduating  
40 from medical school, most physicians immediately start working as general practitioners (GPs) with about  
41 5% of medical school graduates enrolling in 1 of 4 competitive internal medicine (IM) residency programs  
42 in the country.<sup>10,11</sup> There are no formal cardiology training programs in Haiti. The 16 cardiologists who  
43 currently work in Haiti received their training outside of Haiti given the absence of formal postgraduate  
44 training programs in cardiovascular disease. Many obtained formal cardiology fellowship training in  
45 countries such as France, Cuba and the United States of America (USA). Given the lack of training  
46 opportunities and cardiologists in the context of high CVD burden, it is apparent that there is a need for  
47 additional cardiovascular education support for healthcare providers both in and out of training  
48 programs.  
49  
50

51 Hôpital Universitaire de Mirebalais (HUM) is 1 of only 4 IM residency programs in Haiti, training an  
52 estimated 20-25% of all IM residents in the country.<sup>11</sup> HUM is one of the largest teaching hospitals and  
53 one of the only to receive accreditation from the Accreditation Council for Graduate Medical Education  
54 International (ACGME-I).<sup>12</sup> HUM has an integrated public and private structure with a robust partnership  
55 with Haiti's Ministry of Health. Its structure enables it to be both affordable and accessible to the general  
56  
57  
58  
59  
60

1  
2  
3 public. HUM also has access to imaging modalities such as computed tomography (CT) and ultrasound  
4 making echocardiography possible. Due to the affordability and high reputability of HUM, it serves as a  
5 large referral center. Patients travel long distances to seek treatment for some of the most advanced  
6 diseases and severe pathology. This holds true for cardiovascular patients with nearly 40% of all  
7 admissions to the internal medicine ward being for heart failure and 60% of those heart failure admissions  
8 being women.<sup>6</sup> Despite the high prevalence of CVD among hospitalized patients at HUM, however, access  
9 to cardiologists is limited. Thus, the IM residents are left to care for these patients without access to  
10 optimal cardiovascular education and support.  
11  
12

13 In an attempt to address the needs at HUM, one of the largest teaching hospitals which serves a sizable  
14 catchment area, we developed a pilot educational program through the creation of an international virtual  
15 classroom to deliver an adaptive cardiovascular curriculum to IM residents at HUM. Initially developed  
16 and executed before the COVID-19 pandemic began, the purpose of ICARDs-Haiti has evolved. The value  
17 and goals of the curriculum are now two-fold: to provide pertinent educational material and also to  
18 maintain educational activities during the ongoing COVID-19 pandemic in Haiti. Here, we describe a proof-  
19 of-concept and first attempt at bridging the cardiovascular education and training divide in a resource-  
20 limited setting through the execution of a virtual classroom utilizing live-streamed, lectures and an  
21 interactive discussion format.  
22  
23

#### 24 **Methods:**

25 In May 2019, ICARDs-Haiti was created by a chief resident at Hôpital Universitaire de Mirebalais (who is  
26 now a cardiology trainee in France) and a University of Pennsylvania (UPenn) Cardiology fellow under the  
27 auspices of the educational leadership from their respective institutions. Thereafter, a formal  
28 international collaboration between HUM physicians and UPenn cardiologists was forged with the  
29 objective to create a dynamic, adaptive and comprehensive curriculum that included locally relevant and  
30 useful educational cardiology content. An IRB exemption was obtained from the Zanmi Lasante/HUM IRB  
31 committee.  
32  
33

34 Prior to the initiation of ICARDs-Haiti, the cardiology curriculum at HUM was undergoing significant  
35 restructuring due to the lack of a full-time cardiovascular specialist. The HUM IM faculty created a list of  
36 pertinent cardiovascular topics. They planned for oral presentations by residents and a weekly academic  
37 discussion with a local cardiologist. Despite the aforementioned aspirations, in practice, the amount of  
38 time that local cardiovascular specialists were able to commit to education at HUM was  
39 limited. Additionally, due to travel restrictions that were imposed due to political instability (and later the  
40 COVID-19 pandemic) visiting cardiologists from the USA and Europe were unable to visit to support  
41 trainees and faculty at HUM. The consequence of these limitations was a lack of routine, consistent and  
42 comprehensive cardiovascular education despite the high CVD burden among HUM patients. Due to the  
43 need for improved and continual cardiovascular education, HUM chief residents and a HUM-affiliated,  
44 local cardiologist sought assistance in creating a more consistent and comprehensive cardiology  
45 curriculum for HUM's trainees by soliciting assistance from colleagues abroad who had spent significant  
46 time in Haiti. A global network of medical educators was subsequently created to address this need.  
47 Through international collaboration, a revised list of pertinent cardiology topics and respective learning  
48 objectives relevant to medical practice in Haiti was created. The American College of Cardiology (ACC)  
49 core competency recommendations for cardiology trainees were also used as a guide. Volunteer lecturers  
50 consisted of cardiology fellows, attendings and internists from UPenn, Boston University, Mount Sinai  
51 medical center in Miami, New York University (NYU), SUNY Downstate and Centre Hospitalier d'Antibes  
52 Juan-les-Pins (Provence Alpes Côtes d'Azur, France). Many of the lecturers had personal ties to Haiti and  
53 were also multilingual. Lectures were given in either English, French, Haitian Creole or a mixture of these  
54  
55  
56  
57  
58  
59  
60

1  
2  
3 languages. The assessed curricular content was created and delivered by 8 lecturers 50% of whom were  
4 multilingual. The vast majority of IM residents at HUM are fluent in English, French and Haitian Creole,  
5 although English comprehension skills are variable. The curriculum was implemented using the ADDIE  
6 training model (Analysis, Design, Development, Implementation, Evaluation), an instructional design  
7 methodology.<sup>13</sup> It is currently being used as a guide for the implementation and adaptation of this  
8 curriculum based on written and verbal feedback from the IM residents.  
9

10  
11 Lectures were executed biweekly via video conference platforms and each lecture was preceded and  
12 followed by anonymous, unmatched pre- and post-knowledge assessments. The assessments were  
13 delivered via the Qualtrics program and distributed via a commercially available, internet-based mobile  
14 phone communication application. Lecture reading materials were distributed via SLACK (Searchable Log  
15 of All Conversation and Knowledge), an online communication platform. The cardiovascular topics and  
16 learning objectives for the curriculum were determined by a leadership council which consisted of  
17 cardiovascular fellows and faculty at UPenn as well as the IM program director and the chief residents at  
18 HUM and a local Haitian cardiologist. The content for each lecture was created by volunteer lecturers  
19 from the aforementioned institutions and was reviewed by the leadership council. In total, 20 live-  
20 streamed, biweekly synchronous sessions, which included active audience participation, were delivered.  
21 The live-streamed lectures were supplemented with case presentations and seminars. The cardiology  
22 topics covered in the curriculum included stenotic valvular lesions, regurgitant valvular lesions, heart  
23 failure (HF), peripartum cardiomyopathy (PPCM), cardiogenic shock, pharmacology of HF medications  
24 (therapeutics, inotropes and vasodilators), congenital heart disease (CHD) specifically atrial septal defects,  
25 rheumatic heart disease (RHD), preoperative risk assessment, peripheral arterial disease (PAD),  
26 echocardiography basics, COVID-19, syncope, hypertension and interactive EKG conferences. For most of  
27 the aforementioned topics, the following content was provided: physiology, pathophysiology, clinical  
28 presentation, physical exam findings, medical management and indications for interventional procedures  
29 and surgery. For pre-operative risk assessment, the risk stratification of various surgeries and patients,  
30 preoperative work-up and perioperative medication management were discussed. For echocardiography,  
31 the acquisition and interpretation of basic echocardiography views was reviewed. Two new categories  
32 were created for data analysis, surgical appropriateness and critical care management. Surgical  
33 appropriateness consisted of content that covered preoperative risk assessment and indications for  
34 interventional procedures or surgery for CHD and valvular disease. Critical care management consisted of  
35 content that covered the differentiation and management of shock based on physical exam and  
36 hemodynamic profiles. Acute respiratory distress syndrome (ARDS) was also discussed in the specific  
37 context of the COVID-19 pandemic.  
38  
39  
40  
41

42 Between May 2019 and May 2020, there were 16 IM residents at HUM of whom 20% were women and  
43 80% were men. There were 6 first year residents, 5 second year residents and 5 third year residents. The  
44 ages of the IM residents ranged from 25-30 years old. The ICARDs curriculum was integrated into the  
45 trainees' pre-existing didactic schedule. Thus, all 16 residents participated in this 1-year research study.  
46 Sessions were held on Monday evenings for one hour. Surveys included subjective confidence rating  
47 assessments typically with 5 answer choices that most commonly ranged from strongly disagree to  
48 strongly agree. Objective assessments took the form of multiple-choice questions with correct and  
49 incorrect answers (appendix 1).  
50  
51

52  
53 **Patient and Public Involvement:** Patients or the public were not involved in the design, or conduct, or  
54 reporting, or dissemination of this research.  
55  
56  
57  
58  
59



**Statistical analysis:**

Statistical analysis was performed using SAS software. The Wilcoxon Mann-Whitney U-test was used for data analysis due to the non-parametric nature of the data and the small sample size. Cohen's (r) was used to estimate effect sizes. Effect sizes ranging from 0.1 to <0.3 were interpreted as small, effect sizes ranging from 0.3 to <0.5 were interpreted as moderate, and effect sizes of 0.5 and greater were interpreted as large.<sup>14</sup>

**Results:**

Analysis of 56 items (see appendix) revealed that 32% of the assessed curricular content was associated with a small effect size, 39% was associated with a moderate effect size and 29% was associated with a large effect size. The small effect size category was further subdivided into a small effect size due to the Ceiling Effect and a small effect size without the Ceiling Effect. We defined the Ceiling Effect as subjective or objective assessments associated with a small effect size <0.3 for which the post-assessments had perfect scores (the ceiling). The percentage of the curriculum with a small effect size with and without the Ceiling Effect was 12% and 20% respectively (Figure 1). When the 56 items were analyzed based on topic category, we found that the majority of the effect sizes for surgical appropriateness, critical care management, PAD, valvular disease and CHD were moderate to large suggesting that these topics had more of an impact (Figure 2). In contrast, HF, echocardiography, and pharmacology had a larger proportion of small effect sizes implying that there was no meaningful difference between the pre- and post-assessments (Figure 2).

A notable proportion of the small effect sizes were due to the Ceiling Effect with high pre-assessment scores and post-assessment scores of 100% (Table 1). Additionally, Figure 3 shows that topics taught by monolingual English speakers were associated with a higher proportion of small effect sizes without the Ceiling Effect (24%) when compared to lectures provided by multilingual lecturers (14%). Four objective assessments; comprehension of the continuity equation, appropriate dosing of dopamine for cardiogenic shock, identifying a hemodynamically significant Qp:Qs ratio (shunt fraction) and correctly identifying all guideline directed medical therapy (GDMT) for HF, were associated with small negative effect sizes, due to a slightly higher proportion of students answering the objective questions correctly prior to the intervention. Notably, these topics were taught by monolingual English Speakers (Table 1).

All participants completed an end of the year survey. When asked whether the material covered by the curriculum was relevant to medical practice in Haiti, 56.3% of participants agreed and 37.5% strongly agreed. When asked about the commitment of the course directors, 12.5% of participants reported the commitment as good and 87.5% as very good to excellent. In the context of clearly delineated learning objectives, all participants reported learning what they expected from the curriculum with 46% reporting that the curriculum exceeded their learning expectations. For the overall evaluation of the course, all participants reported that the course was good to excellent. When asked if they would like to incorporate recorded lectures into the curriculum, 25% of participants reported that they preferred only live lectures, 75% preferred a mix of live and pre-recorded lectures and 0% preferred only pre-recorded lectures.

When asked how the curriculum could be improved, participants recommended streamlining the lectures, increasing the number of practice questions, incorporating French and Haitian Creole verbal or written translation into the lectures and implementing a hands-on echocardiography experience. Participants identified a number of strengths which included but were not limited to the diversity of lecturers, incorporation of French and Haitian Creole into some of the lectures, the relevance of the content to

1  
2  
3 medical practice in Haiti, the amount of material learned and the pre- and post-lecture questions as  
4 pertinent learning aids to reinforce retention of the information presented in the lectures.  
5

### 6 **Discussion:**

7 In an attempt to address the deficiency of formal cardiovascular education and routine access to  
8 cardiologists in Haiti, we created a virtual, collaborative, international cardiology curriculum for IM  
9 trainees at HUM, where nearly 40% of all admissions to the medical ward are due to CVD.<sup>6</sup> The  
10 aforementioned results suggest that the curriculum has been impactful. Analysis demonstrated that 68%  
11 of the assessed curriculum had a moderate to large effect size indicating a noteworthy educational impact  
12 based on pre- and post-lecture assessments. When small effect sizes due to the Ceiling Effect are  
13 included, 80% of the curriculum demonstrates a positive trend in knowledge acquisition post-  
14 intervention.  
15

16  
17  
18 The topics associated with moderate to large effect sizes included surgical appropriateness, critical care  
19 management, PAD, CHD and valvular heart disease. After receiving the curriculum, trainees felt more  
20 confident in their ability to identify indications for interventional procedures and surgical intervention for  
21 valvular disease and CHD. Trainees were also more confident in knowing when to appropriately refer  
22 patients to cardiovascular specialists for corrective interventions. Additionally, trainees demonstrated an  
23 improvement in the objective assessments of preoperative risk, medical management of valvular disease  
24 and critical care management. An improvement in the assessment scores of the aforementioned topics  
25 is important given the high prevalence of RHD and severe HF among patients admitted to HUM. Based  
26 on a study by Kwan et al. from 2016, 37% of all HUM admissions were for HF and more than 60% of HF  
27 patients were women.<sup>6</sup> Of those women with cardiomyopathy, 50% were diagnosed with PPCM. <sup>6</sup> Five  
28 percent of cardiovascular admissions were due to RHD with notable valvular disease identified by  
29 echocardiography.<sup>6</sup> Notably, although access to cardiac surgery is restricted, organizations such as the  
30 Haiti Cardiac Alliance (HCA) work to facilitate surgical referrals and long-term follow up for cardiac surgery  
31 patients in Haiti.<sup>15</sup> Thus, educating GPs and internists on timely referral of cardiovascular patients to  
32 specialists and entities equipped to provide specialized care, as well as corrective interventions, can  
33 improve cardiovascular outcomes for patients with severe CVD in Haiti.  
34  
35

36  
37 The topics associated with a large proportion of the small effect sizes are shown in Table 1. Many of the  
38 small effect sizes were explained by trainee's pre-existing medical knowledge and comfort with those  
39 topics. One reason that trainees may have scored highly on a number of the pre-assessments could be  
40 from prior exposure to these topics, before ICARDs-Haiti curriculum implementation. Additionally,  
41 trainees were not separated by their training year. Senior residents were likely to be more familiar with  
42 some of these topics than junior residents were, thus creating smaller effect sizes than if trainees had  
43 been separated by their training year.  
44

45  
46 Four topics (shunt fraction, continuity equation comprehension, HF guideline-directed medical therapy  
47 (GDMT) and Dopamine dosing) were associated with small negative effect sizes. All 4 of these  
48 assessments were objective and were taught only in English without French or Haitian Creole translation.  
49 Thus, the lack of a positive and moderate to large effect size for these topics is likely multifactorial and  
50 causality may include a lack of content clarity, topic complexity and language comprehension. A larger  
51 proportion of topics taught by multilingual lecturers with personal ties to Haiti, were associated with  
52 moderate to large effect sizes. This highlights the importance of not only language, but also cultural  
53 contextualization for learning. These findings represent a real-world application of a curriculum that  
54 helped to fill an educational void that hopefully also enhanced peer-to-peer education. Furthermore, all  
55 participants completed the end of the year general assessment for which the overall rating of the  
56  
57  
58  
59

1  
2  
3 curriculum was good to excellent. The residents also reported that the topics covered in the curriculum  
4 were highly relevant to current medical practice in Haiti given the focus on HF (including peripartum  
5 cardiomyopathy), hypertension and RHD.  
6

7  
8 Looking ahead, we plan to modify the ICARDs curriculum to better address the educational needs in this  
9 region. We will provide written or verbal French or Haitian Creole translation for all future lectures. For  
10 the topics associated with small effect sizes without the Ceiling Effect, we will reevaluate and  
11 restructure these lectures for improved clarity, in joint consultation with our Haitian collaborators. For  
12 the topics associated with small effect sizes with the Ceiling Effect (implying that the trainees were  
13 already familiar with the topics), we will refocus our educational efforts on other higher yield topics.  
14 Learning objectives for various topics will be stratified by training year. To improve on the objective  
15 assessment results, we will incorporate more homework assignments which will then be reviewed in  
16 smaller, interactive seminar sessions, that support comprehension of complex topics. To diversify the  
17 mode of curriculum delivery, we will include both synchronous and asynchronous educational content,  
18 modeling the flipped classroom approach which, when done correctly, has been proven to be an  
19 effective teaching methodology.<sup>16</sup> As per participant feedback, we will also incorporate hands-on  
20 experiences utilizing diagnostic tools for capacity building and skill development. Over the next 3 years,  
21 we will follow the residents through their first year of independent practice as internists to assess the  
22 longitudinal impact of the curriculum. Lastly, we hope to extend continuing cardiovascular education to  
23 general practitioners.  
24  
25

26  
27 Given the success of this curriculum in improving cardiovascular education for IM trainees at HUM, we  
28 view this as a successful pilot study. We plan to implement the aforementioned changes and assess  
29 longitudinal impact. If there is a marked improvement, we plan to expand to additional sites to deliver  
30 much needed cardiovascular education to GPs, mid-level providers and internists in low resource  
31 settings.  
32

### 33 **Limitations:**

34 The current study is the first to describe and present data in support of the utilization of an adaptive  
35 international cardiology curriculum delivered via an interactive and dynamic virtual classroom in Haiti.  
36 However, the study has specific limitations. The small sample size is a limitation. Given the grassroots  
37 nature of ICARDs-Haiti, it was initially launched at one teaching hospital as a pilot program which limited  
38 the sample size. Additionally, only immediate pre- and post-assessment results were obtained. Thus,  
39 although knowledge acquisition was notable among the residents at HUM, the impact on long term  
40 knowledge retention remains unclear. Language barriers were another limitation of the study. This is  
41 supported by the fact that topics taught by multilingual lecturers were more likely to be associated with  
42 moderate to large effect sizes. The fact that trainees were not separated by their training year is another  
43 limitation of the study and likely led to smaller effect sizes. Lastly, although lecture materials were  
44 reviewed by the leadership council and although the diversity of the lecturer cohort was a strength of the  
45 curriculum, variability in lecture delivery and verbal communication may have impacted the effect size for  
46 certain topics.  
47  
48  
49

### 50 **Conclusion:**

51 This international cardiology curriculum is delivered via remote distance learning to meet the educational  
52 needs of physicians-in-training in Haiti. Thus far, the curriculum has been delivered to 1 of 4 IM training  
53 programs in the country.<sup>11</sup> By utilizing a live, dynamic, and international virtual classroom, we were able  
54 to successfully provide important cardiovascular educational content and demonstrate positive trends in  
55 knowledge acquisition through pre, post and end of the year assessments. Future directions of this  
56  
57  
58  
59  
60

1  
2  
3 experience will lend themselves towards improving the curriculum and standardizing a component of the  
4 lecture platform. This will allow for both synchronous and asynchronous educational development that  
5 can eventually be expanded to other resource limited settings that lack cardiology training programs and  
6 specialists. In the long run, we hope that this will help to address global health disparities in cardiovascular  
7 education in resource-limited settings and serve as a valuable adjunct to onsite global health endeavors  
8 in the future.  
9

10  
11  
12 **Data Availability Statement:** The authors confirm that the data supporting the findings of this study are  
13 available within the article and in the uploaded supplementary information.  
14  
15

## 16 17 18 19 20 21 22 23 **References**

- 24  
25 1. Cardiovascular diseases (CVDs). [https://www.who.int/en/news-room/fact-sheets/detail/cardiovascular-](https://www.who.int/en/news-room/fact-sheets/detail/cardiovascular-diseases-(cvds))  
26 [diseases-\(cvds\)](https://www.who.int/en/news-room/fact-sheets/detail/cardiovascular-diseases-(cvds)). Accessed August 24, 2020.
- 27  
28 2. GBD 2015 DALYs and HALE Collaborators. Global, regional, and national disability-adjusted life-years  
29 (DALYs) for 315 diseases and injuries and healthy life expectancy (HALE), 1990-2015: a systematic  
30 analysis for the Global Burden of Disease Study 2015. *Lancet*. 2016;388(10053):1603-1658.  
31 doi:10.1016/S0140-6736(16)31460-X
- 32  
33 3. Omran AR. The epidemiologic transition: a theory of the epidemiology of population change. 1971.  
34 *Milbank Q*. 2005;83(4):731-757. doi:10.1111/j.1468-0009.2005.00398.x
- 35  
36 4. diseases C. Cancers 30%Communicable, maternal, perinatal and nutritional conditions.
- 37  
38 5. Davis MB, Arany Z, McNamara DM, Goland S, Elkayam U. Peripartum Cardiomyopathy: JACC State-of-  
39 the-Art Review. *J Am Coll Cardiol*. 2020;75(2):207-221. doi:10.1016/j.jacc.2019.11.014
- 40  
41 6. Kwan GF, Jean-Baptiste W, Cleophat P, et al. Descriptive epidemiology and short-term outcomes of  
42 heart failure hospitalisation in rural Haiti. *Heart*. 2016;102(2):140-146. doi:10.1136/heartjnl-2015-  
43 308451
- 44  
45 7. EMMUS VI Rapport de synthèse 2018 | UNICEF Haïti. [https://www.unicef.org/haiti/rapports/emmus-vi-](https://www.unicef.org/haiti/rapports/emmus-vi-rapport-de-synth%C3%A8se-2018)  
46 [rapport-de-synth%C3%A8se-2018](https://www.unicef.org/haiti/rapports/emmus-vi-rapport-de-synth%C3%A8se-2018). Accessed August 25, 2020.
- 47  
48 8. Young Haitian Doctors Begin Medical Residencies at University Hospital | Partners In Health.  
49 <https://www.pih.org/article/young-haitian-doctors-begin-medical-residencies-at-university-hospital>.  
50 Accessed August 24, 2020.
- 51  
52 9. Le Nouvelliste - Lueur d'espoir pour la cardiologie en Haïti.  
53 <https://lenouvelliste.com/article/104570/lueur-despoir-pour-la-cardiologie-en-haiti>. Accessed  
54 September 6, 2020.
- 55  
56 10. Ministère de la Santé Publique et de la Population – Ministère de la Santé Publique et de la Population.  
57 <https://www.mspp.gouv.ht/>. Accessed August 26, 2020.  
58  
59  
60

11. Ministère de la Santé Publique et de la Population.  
<https://mspp.gouv.ht/newsite/documentation.php?page=362&param1=valu1&param2=value2>.  
Accessed September 7, 2020.
12. University Hospital in Haiti Earns Global Accreditation as Teaching Institution | Partners In Health.  
<https://www.pih.org/article/university-hospital-haiti-earns-global-accreditation-teaching-institution>.  
Accessed November 5, 2020.
13. Patel SR, Margolies PJ, Covell NH, Lipscomb C, Dixon LB. Using Instructional Design, Analyze, Design, Develop, Implement, and Evaluate, to Develop e-Learning Modules to Disseminate Supported Employment for Community Behavioral Health Treatment Programs in New York State. *Front Public Health*. 2018;6:113. doi:10.3389/fpubh.2018.00113
14. Fritz CO, Morris PE, Richler JJ. Effect size estimates: current use, calculations, and interpretation. *J Exp Psychol Gen*. 2012;141(1):2-18. doi:10.1037/a0024338
15. Robinson O, Kwan GF, Romain J-L, Crapanzano M, Wilentz JR. A national coordinated cardiac surgery registry in Haiti: the Haiti cardiac alliance experience. *The Lancet Global Health*. 2016;4:S31. doi:10.1016/S2214-109X(16)30036-5
16. Narang A, Velagapudi P, Rajagopalan B, et al. A New Educational Framework to Improve Lifelong Learning for Cardiologists. *J Am Coll Cardiol*. 2018;71(4):454-462. doi:10.1016/j.jacc.2017.11.045

Figure 1. Effect Size Proportionality for the iCARDS-Haiti Curriculum

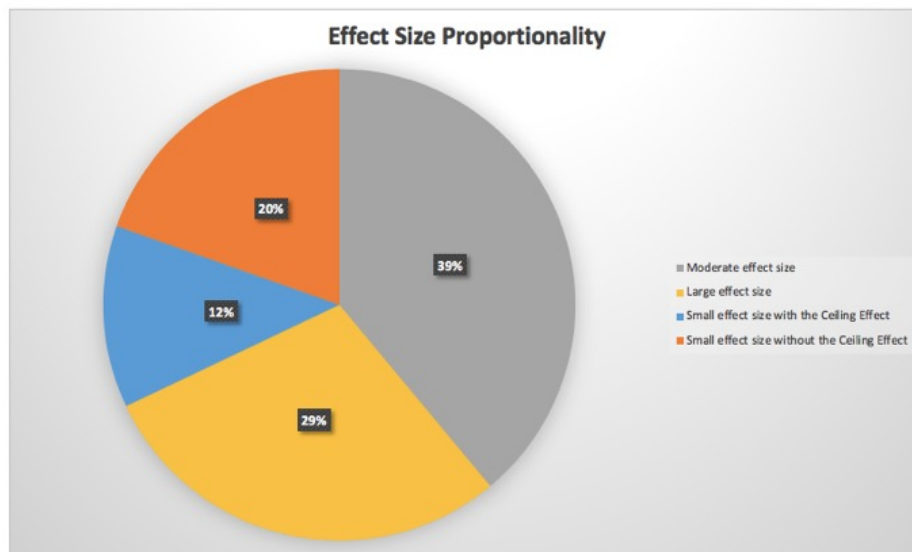

Figure 1 shows the effect size proportionality for the entire iCARDS-Haiti curriculum. As shown above, 68% of the curriculum was associated with a moderate to large effect size. 12% of the curriculum was associated with a small effect size due to the Ceiling Effect while 20% of the curriculum was associated with a small effect size not attributable to the Ceiling Effect.

260x190mm (72 x 72 DPI)

Figure 2. Effect size proportionality for topics covered in the iCARDS-Haiti Curriculum

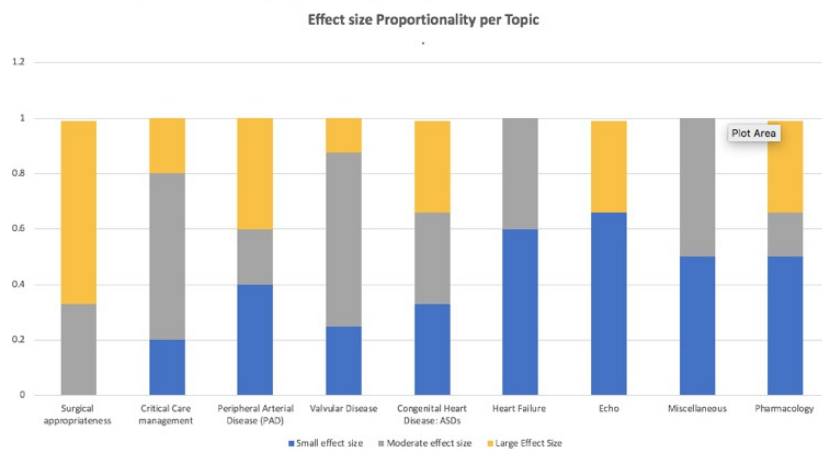

Figure 2 shows the proportion of topics associated with large, moderate and small effect sizes. The majority of surgical appropriateness, critical care management, PAD, valvular disease and congenital heart disease were associated with medium to large effect sizes. The miscellaneous category (syncope & COVID-19) had an even split between small and moderate to large effect sizes. The majority of heart failure, echo and pharmacology were associated with small effect sizes with and without the Ceiling Effect.

321x190mm (72 x 72 DPI)

1  
2  
3  
4  
5  
6  
7  
8  
9  
10  
11  
12  
13  
14  
15  
16  
17  
18  
19  
20  
21  
22  
23  
24  
25  
26  
27  
28  
29  
30  
31  
32  
33  
34  
35  
36  
37  
38  
39  
40  
41  
42  
43  
44  
45  
46  
47  
48  
49  
50  
51  
52  
53  
54  
55  
56  
57  
58  
59  
60

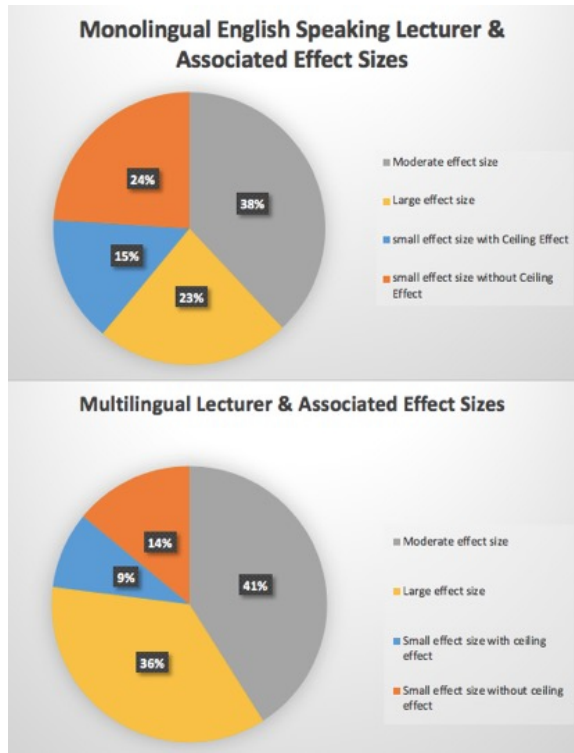

**Panel A** shows the association between monolingual English lecturers and effect size. 61% of the topics taught by monolingual English lecturers were associated with moderate to large effect sizes. 24% percent of the topics taught by monolingual English lecturers were associated with small effect sizes not attributable to the ceiling effect.

**Panel B** shows the association between multilingual lecturers and effect size. 77% of the topics taught by multilingual lecturers were associated with medium to large effect sizes. 14% of the topics taught by multilingual lecturers were associated with small effect sizes not attributable to the ceiling effect.

254x190mm (72 x 72 DPI)



Table 1

| Objective Assessments Associated with small effect sizes <0.3                                             | Percent of trainees who answered objective questions correctly pre-intervention | Percent of trainees who answered objective questions correctly post-intervention | Presence of the Ceiling Effect | Fluency of the lecturers |
|-----------------------------------------------------------------------------------------------------------|---------------------------------------------------------------------------------|----------------------------------------------------------------------------------|--------------------------------|--------------------------|
| Correctly identifying a common cause of vasovagal syncope                                                 | 30%                                                                             | 50%                                                                              | No                             | Multilingual             |
| Correctly identifying COVID-19 cardiac complications                                                      | 86%                                                                             | 100%                                                                             | Yes                            | English, Monolingual     |
| Correctly identifying the mechanism of action of Dobutamine                                               | 63%                                                                             | 88%                                                                              | No                             | English, Monolingual     |
| Correctly identifying the characteristics of an aortic stenosis murmur                                    | 86%                                                                             | 100%                                                                             | Yes                            | English, Monolingual     |
| Correctly identifying a normal ankle brachial index range                                                 | 100%                                                                            | 100%                                                                             | Yes                            | Multilingual             |
| Correctly identifying the mechanism of action of Milrinone                                                | 57%                                                                             | 75%                                                                              | No                             | Multilingual             |
| Correctly identifying cardiogenic shock based on hemodynamic profile                                      | 57%                                                                             | 71%                                                                              | No                             | Multilingual             |
| Correctly identifying the most appropriate management of cardiogenic shock based on clinical presentation | 29%                                                                             | 54%                                                                              | No                             | English, Monolingual     |
| Correctly identifying structural abnormalities associated with a longstanding atrial septal defect        | 70%                                                                             | 83%                                                                              | No                             | English, Monolingual     |

|                                                                               |                                                                                                           |                                                                                                            |                                |                         |
|-------------------------------------------------------------------------------|-----------------------------------------------------------------------------------------------------------|------------------------------------------------------------------------------------------------------------|--------------------------------|-------------------------|
| Correctly identifying a hemodynamically significant Qp:Qs ratio*              | 60%                                                                                                       | 33%                                                                                                        | No                             | English, Monolingual    |
| Correctly identifying all heart failure guideline directed medical therapies* | 77%                                                                                                       | 75%                                                                                                        | No                             | English, Monolingual    |
| Correctly dosing Dopamine for cardiogenic shock *                             | 71%                                                                                                       | 50%                                                                                                        | No                             | English, Monolingual    |
| Correctly identifying the definition of the continuity equation *             | 83%                                                                                                       | 71%                                                                                                        | No                             | English, Monolingual    |
| Subjective Confidence assessments associated with small effect sizes <0.3     | Percent of trainees who were either comfortable or very comfortable on the rating scales pre-intervention | Percent of trainees who were either comfortable or very comfortable on the rating scales post-intervention | Presence of the Ceiling Effect | Fluency of the Lectures |
| Comfort with guideline directed medical therapy for heart failure             | 100%                                                                                                      | 100%                                                                                                       | Yes                            | English, Monolingual    |
| Comfort with performing a heart failure history and physical exam             | 100%                                                                                                      | 100%                                                                                                       | Yes                            | English, Monolingual    |
| Comfort with identifying standard echo views                                  | 100%                                                                                                      | 100%                                                                                                       | Yes                            | English, Monolingual    |
| Comfort identifying risk factors for peripheral arterial disease              | 83.30%                                                                                                    | 100%                                                                                                       | Yes                            | Multilingual            |
| Comfort managing aortic insufficiency                                         | 50%                                                                                                       | 85.70%                                                                                                     | No                             | English, Monolingual    |

\*Negative small effect sizes

**Appendix Table 1**

Yellow=Large effect, Gray=Medium effect, Blue=Small Effect

\*Objective Assessments

|                                                                                          | Effect Size: |
|------------------------------------------------------------------------------------------|--------------|
| <b>Surgical appropriateness</b>                                                          |              |
| Knowing the criteria for ASD repair                                                      | 0.63         |
| Knowing when to refer patients with MS for corrective interventions                      | 0.57         |
| Familiarity with the Wilkins score                                                       | 0.36         |
| Knowing when to refer patients with MR for corrective intervention                       | 0.46         |
| knowing when to refer patients with AI to surgery                                        | 0.48         |
| comfort performing a pre-operative assessment                                            | 0.63         |
| Knowing which surgeries are considered low, intermediate and high risk                   | 0.52         |
| Ability to Identify appropriate work-up for low risk surgical candidates*                | 0.82         |
| Ability to identify appropriate work-up for high risk surgical candidate*                | 0.63         |
| <b>Critical Care management</b>                                                          |              |
| knowing the pathophysiology of cardiogenic shock                                         | 0.33         |
| comfort with the management of cardiogenic shock                                         | 0.48         |
| knowing the different types of mechanical assist devices used to treat cardiogenic shock | 0.34         |
| knowing the hemodynamics of cardiogenic shock                                            | 0.48         |
| Knowing when to refer patients for invasive hemodynamic monitoring (RHC)                 | 0.79         |
| Confidence in recognition of normal hemodynamic tracings                                 | 0.48         |
| Ability to identify the most appropriate management of cardiogenic shock*                | 0.26         |
| Ability to correlate a hemodynamic profile with the correct type of shock*               | 0.12         |
| Ability to identify the p/f ratio indicative of severe ARDS*                             | 0.56         |
| Ability to identify the most appropriate management for septic shock *                   | 0.48         |
| <b>PAD</b>                                                                               |              |
| comfort with managing PAD                                                                | 0.76         |
| Confidence in differentiating chronic from acute limb ischemia                           | 0.46         |
| familiarity with the risk factors for PAD                                                | 0.24         |
| Knowing how to measure an ABI                                                            | 0.52         |
| Ability to identify the normal ABI range *                                               | 0            |
| <b>Valvular Disease</b>                                                                  |              |

|    |                                                              |      |
|----|--------------------------------------------------------------|------|
| 1  |                                                              |      |
| 2  |                                                              |      |
| 3  | Comfort with the anatomy of the mitral valve                 | 0.4  |
| 4  | Comfort with the medical management of MR                    | 0.64 |
| 5  | Comfort identifying a MS murmur                              | 0.37 |
| 6  | Knowing the causes of mitral stenosis                        | 0.36 |
| 7  | Comfort with the management of MS                            | 0.34 |
| 8  | comfort with the management of AI                            | 0.21 |
| 9  | Ability to identify the correct description of an AS murmur* | 0.23 |
| 10 | Ability to identify the AVA for severe AS*                   | 0.49 |
| 11 |                                                              |      |
| 12 |                                                              |      |
| 13 |                                                              |      |
| 14 |                                                              |      |

### Congenital Heart Disease: ASDs

|    |                                                                                 |      |
|----|---------------------------------------------------------------------------------|------|
| 15 |                                                                                 |      |
| 16 |                                                                                 |      |
| 17 | Comfort quantifying a cardiac shunt using the Qp/Qs equation                    | 0.6  |
| 18 | Knowing the different types of ASDs                                             | 0.58 |
| 19 | Ability to identify the EKG finding commonly associated with an ASD*            | 0.49 |
| 20 | Ability to identify cardiac defects frequently seen with ASDs*                  | 0.34 |
| 21 | Ability to identify structural abnormalities associated with longstanding ASDs* | 0.13 |
| 22 | Ability to correctly identify a hemodynamically significant Qp:Qs ratio*        | 0.23 |
| 23 |                                                                                 |      |
| 24 |                                                                                 |      |
| 25 |                                                                                 |      |

### Heart Failure

|    |                                            |      |
|----|--------------------------------------------|------|
| 26 |                                            |      |
| 27 | Comprehension of HF pathophysiology        | 0.39 |
| 28 | Comfort with interpretation of the HF exam | 0.38 |
| 29 | Knowing GDMT for HF                        | 0.27 |
| 30 | Comfort performing a H&P on a HF patient   | 0.15 |
| 31 | Ability to identify GDMT*                  | 0.02 |
| 32 |                                            |      |
| 33 |                                            |      |

### Echo

|    |                                                             |      |
|----|-------------------------------------------------------------|------|
| 34 |                                                             |      |
| 35 | Comfort identifying standard echocardiography views         | 0.13 |
| 36 | Demonstrating an understanding of the continuity equation * | 0.11 |
| 37 | Ability to calculate AVA based on echo parameters*          | 0.54 |
| 38 |                                                             |      |
| 39 |                                                             |      |
| 40 |                                                             |      |

### Miscellaneous

|    |                                                                          |      |
|----|--------------------------------------------------------------------------|------|
| 41 |                                                                          |      |
| 42 |                                                                          |      |
| 43 | Knowing the differential diagnosis for syncope                           | 0.4  |
| 44 | Knowing the work-up for syncope                                          | 0.39 |
| 45 | Ability to identify COVID-19 cardiac complications*                      | 0.24 |
| 46 | Ability to correctly identify a common provocation of vasovagal syncope* | 0.19 |
| 47 |                                                                          |      |
| 48 |                                                                          |      |
| 49 |                                                                          |      |

### Pharmacology

|    |                                                                        |      |
|----|------------------------------------------------------------------------|------|
| 50 |                                                                        |      |
| 51 | Ability to identify the mechanism by which Digoxin decreases HR*       | 0.37 |
| 52 | Ability to identify the mechanism of action of Nipride *               | 0.57 |
| 53 | Ability to identify how dopamine is cleared*                           | 0.73 |
| 54 | Ability to identify appropriate dopamine dosing for cardiogenic shock* | 0.19 |
| 55 |                                                                        |      |
| 56 |                                                                        |      |
| 57 |                                                                        |      |
| 58 |                                                                        |      |
| 59 |                                                                        |      |
| 60 |                                                                        |      |

|    |                                                            |      |
|----|------------------------------------------------------------|------|
| 1  |                                                            |      |
| 2  |                                                            |      |
| 3  |                                                            |      |
| 4  | Ability to identify the mechanism of action of milrinone * | 0.16 |
| 5  | Ability to identify the mechanism of action of Dobutamine* | 0.26 |
| 6  |                                                            |      |
| 7  |                                                            |      |
| 8  |                                                            |      |
| 9  |                                                            |      |
| 10 |                                                            |      |
| 11 |                                                            |      |
| 12 |                                                            |      |
| 13 |                                                            |      |
| 14 | <hr/>                                                      |      |

15

16 **Sample Subjective Assessment Question with Associated Answer choices:**

17

- 18 1. I know when to refer a patient with mitral stenosis for corrective intervention
- 19 A. Strongly Agree
- 20 B. Agree
- 21 C. Neither agree nor Disagree
- 22 D. Disagree
- 23 E. Strongly Disagree
- 24
- 25
- 26

27 **Sample Objective Assessment Question with Associated Answer choices:**

28

- 29 2. What echocardiography finding would you expect to see with a longstanding ASD?
- 30 A. Hypertrophied RV
- 31 B. Dilated LV
- 32 C. Hypertrophied LV
- 33 D. Dilated RV
- 34
- 35
- 36
- 37 

---
- 38
- 39
- 40
- 41
- 42
- 43
- 44
- 45
- 46
- 47
- 48
- 49
- 50
- 51
- 52
- 53
- 54
- 55
- 56
- 57
- 58
- 59
- 60

# BMJ Open

## The Implementation of a Virtual International Cardiology Curriculum to Address the Deficit of Cardiovascular Education in Haiti: A Pilot Study

|                                 |                                                                                                                                                                                                                                                                                                                                                                                                                                                                                                                                                                                                                                                                                                                                                                                  |
|---------------------------------|----------------------------------------------------------------------------------------------------------------------------------------------------------------------------------------------------------------------------------------------------------------------------------------------------------------------------------------------------------------------------------------------------------------------------------------------------------------------------------------------------------------------------------------------------------------------------------------------------------------------------------------------------------------------------------------------------------------------------------------------------------------------------------|
| Journal:                        | <i>BMJ Open</i>                                                                                                                                                                                                                                                                                                                                                                                                                                                                                                                                                                                                                                                                                                                                                                  |
| Manuscript ID                   | bmjopen-2021-048690.R1                                                                                                                                                                                                                                                                                                                                                                                                                                                                                                                                                                                                                                                                                                                                                           |
| Article Type:                   | Original research                                                                                                                                                                                                                                                                                                                                                                                                                                                                                                                                                                                                                                                                                                                                                                |
| Date Submitted by the Author:   | 28-Apr-2021                                                                                                                                                                                                                                                                                                                                                                                                                                                                                                                                                                                                                                                                                                                                                                      |
| Complete List of Authors:       | Haynes, Norrissa; University of Pennsylvania, Cardiology<br>Saint-Joy, Veauthyelau ; Centre Hospitalier d Antibes Juan les Pins, Cardiology<br>Swain , JaBaris; University of Pennsylvania, Cardiovascular Surgery<br>Ezekwesili, Agnes; University of Pennsylvania Perelman School of Medicine<br>Vernet, Fritz; Hôpital Universitaire de Mirebalais, Internal Medicine<br>Dawson , Calixte; Hôpital Universitaire de Mirebalais, Internal Medicine<br>Laneau, Davidson; Hôpital Universitaire de Mirebalais, Internal Medicine<br>Tierney, Ann; University of Pennsylvania, Center for Clinical Epidemiology and Biostatistics<br>Shea, Judy ; University of Pennsylvania, Division of General Internal Medicine<br>Ambrose , Marietta; University of Pennsylvania, Cardiology |
| <b>Primary Subject Heading</b>: | Cardiovascular medicine                                                                                                                                                                                                                                                                                                                                                                                                                                                                                                                                                                                                                                                                                                                                                          |
| Secondary Subject Heading:      | Global health, Medical education and training                                                                                                                                                                                                                                                                                                                                                                                                                                                                                                                                                                                                                                                                                                                                    |
| Keywords:                       | MEDICAL EDUCATION & TRAINING, CARDIOLOGY, PUBLIC HEALTH                                                                                                                                                                                                                                                                                                                                                                                                                                                                                                                                                                                                                                                                                                                          |
|                                 |                                                                                                                                                                                                                                                                                                                                                                                                                                                                                                                                                                                                                                                                                                                                                                                  |

SCHOLARONE™  
Manuscripts



I, the Submitting Author has the right to grant and does grant on behalf of all authors of the Work (as defined in the below author licence), an exclusive licence and/or a non-exclusive licence for contributions from authors who are: i) UK Crown employees; ii) where BMJ has agreed a CC-BY licence shall apply, and/or iii) in accordance with the terms applicable for US Federal Government officers or employees acting as part of their official duties; on a worldwide, perpetual, irrevocable, royalty-free basis to BMJ Publishing Group Ltd ("BMJ") its licensees and where the relevant Journal is co-owned by BMJ to the co-owners of the Journal, to publish the Work in this journal and any other BMJ products and to exploit all rights, as set out in our [licence](#).

The Submitting Author accepts and understands that any supply made under these terms is made by BMJ to the Submitting Author unless you are acting as an employee on behalf of your employer or a postgraduate student of an affiliated institution which is paying any applicable article publishing charge ("APC") for Open Access articles. Where the Submitting Author wishes to make the Work available on an Open Access basis (and intends to pay the relevant APC), the terms of reuse of such Open Access shall be governed by a Creative Commons licence – details of these licences and which [Creative Commons](#) licence will apply to this Work are set out in our licence referred to above.

Other than as permitted in any relevant BMJ Author's Self Archiving Policies, I confirm this Work has not been accepted for publication elsewhere, is not being considered for publication elsewhere and does not duplicate material already published. I confirm all authors consent to publication of this Work and authorise the granting of this licence.

## The Implementation of a Virtual International Cardiology Curriculum to Address the Deficit of Cardiovascular Education in Haiti: A Pilot Study

Norrissa Haynes, MD MPH<sup>1</sup>; Veauthyelau Saint-Joy, MD<sup>2</sup>; JaBaris Swain, MD MPH<sup>3</sup>; Agnes C. Ezekwesili, BSPH<sup>4</sup>; Fritz Verly Vernet, MD<sup>5</sup>; Calixte Dawson, MD<sup>5</sup>; Davidson Laneau, MD<sup>5</sup>; Ann Tierney, MS, Judy A. Shea, PhD<sup>7</sup>, Marietta Ambrose, MD MPH MEd<sup>1</sup>

1Division of Cardiology, University of Pennsylvania, Philadelphia PA: 2 Department of Cardiology, Centre Hospitalier d'Antibes Juan-les-Pins, Antibes Juan-les-Pins, France: 3Division of Cardiovascular Surgery, University of Pennsylvania, Philadelphia PA: 4Perelman School of Medicine at the University of Pennsylvania: 5Department of Medicine, Hôpital Universitaire de Mirebalais, Mirebalais Haiti: 6Center for Clinical Epidemiology and Biostatistics, University of Pennsylvania, Philadelphia, PA: 7Division of General Internal Medicine, University of Pennsylvania, Philadelphia, PA

**Word Count:** 3533

**Acknowledgements:** Special thank you to the internal medicine residents at Hôpital Universitaire de Mirebalais, Dr. Jean-Pierre Brisma, Zanmi Lasante, Dr. Merly Robert, Dr. Gene Kwan, UPenn cardiology fellows, Glenn Gaulton, Penn Global Health, Dr. Garly Saint-Croix, Dr. Michel Ibrahim, Dr. Benedicte LeFevre, Dr. Yann Dagher-Hayck, Dr. Duarcy R. Sainvilien, Dr. Anne Christine Buteau, Dr. Krystal Hill, Dr. Frank Silvestry, Dr. Paul Mather, Dr. Victor Ferrari, Dr. Thomas Cappola, Dr. Joyce Wald, Dr. Mahesh Vidula, Dr. Sri Adusumalli, Denice Susini, Jennifer Cronin. Special thank you to the Penn Cardiovascular Disease Fellowship Innovation Fund for statistical support.

### **Author contributions:**

N.H., V.S.J., conceived and planned the study. N.H., V.S.J., F.V.V., C.D., D.L., and M.A., carried out the study. N.H., V.S.J., performed data collection. A.T., N.H., V.S.J., J.B., M.A., J.A.S., performed data analysis and interpretation. N.H., J.B., V.S.J., drafted the manuscript. M.A., J.S.A., A.E., performed critical revision of the article. N.H., V.S.J., J.B., A.E., F.V.V., C.D., D.L., A.T., J.A.S., and M.A., approved the article to be published.



1  
2  
3  
4  
5 **Funding:** There is no funding to report

6 **Disclosures:** There are no relationships with industry to report. All authors have nothing to  
7 disclose

8 **Ethics Approval Statement:** IRB exemptions were obtained from the Zanmi Lasante/HUM  
9 IRB committee (ID: ZLIRB04062020) and the University of Pennsylvania IRB committee (ID:  
10 ddbcgaj). Participants gave informed consent to participate in this study.  
11  
12  
13  
14  
15

#### 16 **Address for Correspondence:**

17 Norrisa Haynes, MD MPH

18 Hospital of the University of Pennsylvania

19 3400 Spruce Street, Philadelphia PA 19104

20 Phone: (267) 271-7317, Fax: (215) 349-8190

21 [Norrisa.Haynes@pennmedicine.upenn.edu](mailto:Norrisa.Haynes@pennmedicine.upenn.edu)

22 Twitter: @NorrisaHaynes  
23  
24  
25  
26  
27  
28  
29

#### 30 **Abstract:**

31 **Background:** Cardiovascular disease (CVD) remains a leading cause of morbidity and mortality  
32 worldwide, conferring a disparate burden on low and middle-income countries (LMICs). Haiti  
33 represents a resource-constrained setting, limited by a paucity of resources and trained  
34 cardiovascular professionals equipped to address the increasing burden of CVD.  
35  
36

37 **Objective:** Here we describe the creation of a comprehensive cardiology curriculum delivered  
38 through a virtual classroom. The curriculum was created to augment cardiovascular education in  
39 LMICs such as Haiti.  
40  
41  
42

43 **Methods:** Over one academic year (May 2019-2020), ICARDs-Haiti consisted of biweekly, live-  
44 streamed, synchronous didactic lectures, seminars and case presentations broadcasted to 16  
45 internal medicine (IM) residents at Hôpital Universitaire de Mirebalais (HUM), 1 of only 4 IM  
46 training programs in Haiti. The virtual classroom was created using commercially available video  
47 conferencing and data-sharing platforms. Pre- and post-lecture surveys and an end of the year  
48 survey were administered to assess the impact of the curriculum.  
49  
50  
51

52 **Results:** Participant performance analysis revealed that 80% of the curriculum demonstrated a  
53 positive trend in knowledge acquisition post-intervention. Based on the end of the year evaluation,  
54 94% of participants reported that the curriculum was educational and relevant to medical practice  
55  
56  
57  
58  
59  
60

1  
2  
3 in Haiti and 100% reported that the curriculum was good to excellent. Additionally, the curriculum  
4 was cited as an effective means of maintaining trainee education during the COVID-19 pandemic.  
5  
6

7 **Conclusion:** This international medical education pilot study demonstrates the feasibility of  
8 augmenting cardiology education in LMICs by creating a virtual curriculum made possible by  
9 local partnerships, internet access, and technology.  
10  
11

## 12 **Article Summary:**

### 13 **Strengths:**

- 14 1) The application of the ADDIE (Analysis, design, development, implementation and  
15 evaluation) instructional framework enabled a methodical and iterative approach to the  
16 development and implementation of an international curriculum.  
17
- 18 2) Objective knowledge and subjective comfort assessments enabled measurement of  
19 knowledge acquisition and improvement in self-reported comfort with the management of  
20 cardiovascular patients.  
21
- 22 3) Partnership among Haitian, American and French health professionals in the design,  
23 development and implementation of the curriculum helped to ensure that the curriculum  
24 was applicable to providers in low resource settings such as Haiti.  
25  
26  
27

### 28 **Limitations of the study:**

- 29 1) Given that the initial implementation of the pilot occurred at one training site, the sample  
30 size is small.  
31
- 32 2) The use of immediate post-lecture assessments limited the ability to understand program  
33 influence on long-term knowledge retention.  
34  
35  
36  
37  
38

39 **Keywords:** *Haiti, international cardiology curriculum, global health, distance learning*  
40  
41  
42  
43  
44  
45

## 46 **Introduction:**

47  
48 Cardiovascular disease (CVD) accounts for 29% of all deaths in Haiti, and the incidence of  
49 peripartum cardiomyopathy is one of the highest in the world at a rate of 1 in every 300  
50 deliveries.<sup>1,2</sup> Haiti also has a relatively high prevalence of rheumatic heart disease (RHD) at 5% in  
51 rural settings and a high prevalence of hypertensive cardiomyopathy and stroke.<sup>3,4</sup> There is also a  
52 lack of cardiovascular healthcare infrastructure. Although most hospitals have access to EKG  
53 machines, there are no catheterization laboratories in the country. Acute coronary syndromes  
54  
55  
56  
57  
58  
59  
60

1  
2  
3 (ACS) are typically managed medically. There is limited access to cardiac surgery through non-  
4 governmental organizations (NGOs). Additionally, due to a lack of trained professionals, few  
5 hospitals routinely use echocardiography despite its high diagnostic value.  
6  
7

8  
9 Currently, there are only 16 cardiologists countrywide for a population of over 11 million people.<sup>4,5</sup>  
10 There are no formal cardiology training programs in Haiti. The 16 cardiologists who currently  
11 work in Haiti received their training outside of the country given the absence of domestic  
12 postgraduate training programs in cardiovascular disease. Many obtained formal cardiology  
13 fellowship training in countries such as France, Cuba and the United States of America (USA).  
14 Given the lack of training opportunities and cardiologists in the context of high CVD burden, it is  
15 apparent that there is a need for additional cardiovascular education support for healthcare  
16 providers both in and out of training programs.  
17  
18  
19

20  
21 Hôpital Universitaire de Mirebalais (HUM) is 1 of only 4 Internal Medicine (IM) residency  
22 programs in Haiti, training an estimated 20-25% of all IM residents in the country.<sup>6</sup> HUM is one  
23 of the largest teaching hospitals and one of the only to receive accreditation from the Accreditation  
24 Council for Graduate Medical Education International (ACGME-I).<sup>7</sup> It has an integrated public  
25 and private structure with a robust partnership with Haiti's Ministry of Health. Its structure enables  
26 it to be both affordable and accessible to the general public. HUM also has access to imaging  
27 modalities such as ultrasound making echocardiography possible. Patients travel long distances  
28 to seek treatment for some of the most advanced diseases and severe pathology. This holds true  
29 for cardiovascular patients with nearly 40% of all admissions to the internal medicine ward being  
30 for heart failure and 60% of those heart failure admissions being women.<sup>3</sup> Despite the high  
31 prevalence of CVD among hospitalized patients at HUM, access to cardiologists is limited. Thus,  
32 the IM residents are left to care for these patients without access to optimal cardiovascular  
33 education and support.  
34  
35  
36  
37  
38

39 To assist the cardiovascular needs at HUM, one of the largest teaching hospitals which serves a  
40 sizable catchment area, we developed a virtual pilot educational program entitled ICARDs-Haiti  
41 (International Cardiology Curriculum Accessible by Remote Distance Learning) to deliver an  
42 adaptive cardiovascular curriculum to IM residents at HUM. Initially developed and executed  
43 before the onset of the COVID-19 pandemic, the purpose of ICARDs-Haiti has evolved. The value  
44 and goals of the curriculum are now two-fold: to provide pertinent educational material and to  
45 maintain educational activities during the ongoing COVID-19 pandemic in Haiti. Here, we  
46 describe a pilot intervention and first attempt at bridging the cardiovascular education divide in a  
47 resource-limited setting through the execution of a virtual classroom utilizing live-streamed  
48 lectures and an interactive discussion format.  
49  
50  
51  
52

### 53 **Methods:**

54  
55  
56  
57  
58  
59  
60

1  
2  
3 In May 2019, ICARDs-Haiti was created by a chief resident at Hôpital Universitaire de Mirebalais  
4 (who is now a cardiology trainee in France) and a University of Pennsylvania (UPenn) Cardiology  
5 fellow under the auspices of the educational leadership from their respective institutions.  
6 Thereafter, a formal international collaboration between HUM physicians and UPenn cardiologists  
7 was forged with the objective to create a dynamic, adaptive and comprehensive curriculum that  
8 included locally relevant and useful educational cardiology content. IRB exemptions were  
9 obtained from the Zanmi Lasante/HUM and UPenn IRB committees.  
10  
11  
12

13  
14 Prior to initiating ICARDs-Haiti, the cardiology curriculum at HUM was undergoing significant  
15 restructuring due to the lack of a full-time cardiovascular specialist. The HUM IM faculty created  
16 a list of pertinent cardiovascular topics. They planned for oral presentations by residents and a  
17 weekly academic discussion with a local cardiologist. Despite these aspirations, in practice, the  
18 amount of time that local cardiovascular specialists were able to commit to education at HUM was  
19 limited. Additionally, travel restrictions that were imposed due to political instability (and later  
20 the COVID-19 pandemic) prohibited travel of visiting cardiologists from the USA and Europe to  
21 support trainees and faculty at HUM. The consequence of these limitations was a lack of routine,  
22 consistent and comprehensive cardiovascular education despite the high CVD burden among  
23 HUM patients. Due to the need for improved and continual cardiovascular education, HUM chief  
24 residents and a HUM-affiliated, local cardiologist sought assistance in creating a more consistent  
25 and comprehensive cardiology curriculum for HUM's trainees by soliciting assistance from  
26 colleagues abroad who had spent significant time in Haiti. A global network of medical educators  
27 was subsequently created to address this need.  
28  
29  
30  
31  
32

33  
34 Through international collaboration, a revised list of pertinent cardiology topics and respective  
35 learning objectives was created. The American College of Cardiology (ACC) core competency  
36 recommendations for cardiology trainees were also used as a guide. Volunteer lecturers consisted  
37 of cardiology fellows, attendings and internists from UPenn, Boston University, Mount Sinai  
38 Medical Center in Miami, New York University (NYU), SUNY Downstate and Centre Hospitalier  
39 d'Antibes Juan-les-Pins (Provence Alpes Côtes d'Azur, France). Many of the lecturers had  
40 personal ties to Haiti and were also multilingual. Lectures were given in either English, French,  
41 Haitian Creole or a mixture of these languages. The assessed curricular content was created and  
42 delivered by 8 lecturers 50% of whom were multilingual. The vast majority of IM residents at  
43 HUM are fluent in English, French and Haitian Creole, although English comprehension skills are  
44 variable. The curriculum was implemented using the ADDIE training model (Analysis, Design,  
45 Development, Implementation, Evaluation), an instructional design methodology.<sup>8</sup> It is currently  
46 being used as a guide for the implementation and adaptation of this curriculum based on written  
47 and verbal feedback from the IM residents.  
48  
49  
50  
51  
52

53 Lectures were delivered biweekly via video conference platforms, and each lecture was preceded  
54 and followed by anonymous, unmatched pre- and post-knowledge assessments. The assessments  
55  
56  
57  
58  
59

were delivered via the Qualtrics program and distributed via a commercially available, internet-based mobile phone communication application. Lecture reading materials were distributed via SLACK (Searchable Log of All Conversation and Knowledge), an online communication platform. The cardiovascular topics and learning objectives for the curriculum were determined by a leadership council which consisted of cardiovascular fellows and faculty at UPenn as well as the IM program director and the chief residents at HUM and a local Haitian cardiologist. The content for each lecture was created by volunteer lecturers from the aforementioned institutions and was reviewed by the leadership council. The live-streamed lectures were supplemented with case presentations, seminars and included active audience participation. The cardiology topics covered in the curriculum are shown in Table 1. For most of the topics, the following content was provided: physiology, pathophysiology, clinical presentation, physical exam findings, medical management and indications for interventional procedures and surgery.

**Table 1:**  
**ICARDS 2019 – 2020**

| Curriculum | Topics                                                    | Frequency of sessions | Number of lectures |
|------------|-----------------------------------------------------------|-----------------------|--------------------|
|            | Stenotic valvular lesions, Congenital heart disease (CHD) | Bi-Weekly             | 20                 |
|            | Regurgitant valvular lesions                              |                       |                    |
|            | Heart failure (HF)                                        |                       |                    |
|            | Peripartum cardiomyopathy (PPCM),                         |                       |                    |
|            | Cardiogenic shock                                         |                       |                    |
|            | Pharmacology of HF medications                            |                       |                    |
|            | Preoperative work-up                                      |                       |                    |
|            | Perioperative medication management                       |                       |                    |

|                                       |                                                                                   |  |  |
|---------------------------------------|-----------------------------------------------------------------------------------|--|--|
|                                       | Interpretation of basic echocardiography                                          |  |  |
| Medical/<br>Surgical<br>subcategories | Critical care management                                                          |  |  |
|                                       | Surgical appropriateness                                                          |  |  |
| Supplemental<br>topic                 | Acute respiratory distress syndrome (ARDS) - in context of the COVID-19 pandemic. |  |  |

The ICARDs curriculum was integrated into the trainees' pre-existing didactic schedule. Thus, all 16 residents participated in this 1-year research study. Sessions were held on Monday evenings for one hour. Surveys included subjective confidence rating assessments typically with 5 answer choices that most commonly ranged from strongly disagree to strongly agree. Objective assessments took the form of multiple-choice questions with correct and incorrect answers (Appendix Table 1).

**Patient and Public Involvement:** Patients or the public were not involved in the design, or conduct, or reporting, or dissemination of this research.

#### **Statistical analysis:**

Statistical analysis was performed using SAS software. The Wilcoxon Mann-Whitney U-test was used for data analysis due to the non-parametric nature of the data and the small sample size. Cohen's (r) was used to estimate effect sizes. Effect sizes ranging from 0.1 to <0.3 were interpreted as small, effect sizes ranging from 0.3 to <0.5 were interpreted as moderate, and effect sizes of 0.5 and greater were interpreted as large.<sup>9</sup>

#### **Results:**

Between May 2019 and May 2020, there were 16 IM residents at HUM of whom 20% were women and 80% were men. There were 6 first year residents, 5 second year residents and 5 third year residents. The ages of the IM residents ranged from 25-30 years old. Analysis of 56 items (Appendix Table 1) revealed that 32% of the assessed curricular content was associated with a small effect size, 39% was associated with a moderate effect size and 29% was associated with a

1  
2  
3 large effect size. The small effect size category was further subdivided into a small effect size due  
4 to the Ceiling Effect and a small effect size without the Ceiling Effect. We defined the Ceiling  
5 Effect as subjective or objective assessments associated with a small effect size  $<0.3$  for which the  
6 post-assessments had perfect scores (the ceiling). The percentage of the curriculum with a small  
7 effect size with and without the Ceiling Effect was 12% and 20% respectively (Figure 1). When  
8 the 56 items were analyzed based on topic category, we found that the majority of the effect sizes  
9 for surgical appropriateness, critical care management, PAD, valvular disease and CHD were  
10 moderate to large suggesting that these topics had more of an impact (Figure 2). In contrast, HF,  
11 echocardiography, and pharmacology had a larger proportion of small effect sizes implying that  
12 there was no meaningful difference between the pre- and post-assessments (Figure 2).  
13  
14  
15  
16  
17

18 A notable proportion of the small effect sizes was due to the Ceiling Effect with high pre-  
19 assessment scores and post-assessment scores of 100% (Appendix Table 2). Additionally, Figure  
20 3 shows that topics taught by monolingual English speakers were associated with a higher  
21 proportion of small effect sizes without the Ceiling Effect (24%) when compared to lectures  
22 provided by multilingual lecturers (14%) shown in Figure 4. Four objective assessments;  
23 comprehension of the continuity equation, appropriate dosing of dopamine for cardiogenic shock,  
24 identifying a hemodynamically significant Qp:Qs ratio (shunt fraction), and correctly identifying  
25 all guideline directed medical therapy (GDMT) for HF, were associated with small negative effect  
26 sizes, due to a slightly higher proportion of students answering the objective questions correctly  
27 prior to the intervention. Notably, these topics were taught by monolingual English Speakers  
28 (Appendix Table 2).  
29  
30  
31  
32  
33

34 All participants completed an end-of-the year survey. When asked whether the material covered  
35 by the curriculum was relevant to medical practice in Haiti, 56.3% of participants agreed and  
36 37.5% strongly agreed for a total of 94% agreeing that the material was relevant. When asked  
37 about the commitment of the course directors, 12.5% of participants reported the commitment as  
38 good and 87.5% as very good to excellent. In the context of clearly delineated learning objectives,  
39 all participants reported learning what they expected from the curriculum with 46% reporting that  
40 the curriculum exceeded their learning expectations. For the overall evaluation of the course, all  
41 participants reported that the course was good to excellent. When asked if they would like to  
42 incorporate recorded lectures into the curriculum, 25% of participants reported that they preferred  
43 only live lectures, 75% preferred a mix of live and pre-recorded lectures and 0% preferred only  
44 pre-recorded lectures.  
45  
46  
47  
48

49 When asked how the curriculum could be improved, participants recommended streamlining the  
50 lectures, increasing the number of practice questions, incorporating French and Haitian Creole  
51 verbal or written translation into the lectures and implementing a hands-on echocardiography  
52 experience. Participants identified a number of strengths which included but were not limited to  
53 the diversity of lecturers, incorporation of French and Haitian Creole into some of the lectures, the  
54  
55  
56  
57  
58  
59  
60

1  
2  
3 relevance of the content to medical practice in Haiti, the amount of material learned and the pre-  
4 and post-lecture questions as pertinent learning aids to reinforce retention of the information  
5 presented in the lectures.  
6  
7

### 8 9 10 **Discussion:**

11 In an attempt to address the deficiency of formal cardiovascular education and routine access to  
12 cardiologists in Haiti, a virtual, collaborative, international cardiology curriculum for IM trainees  
13 was created at HUM, where nearly 40% of all admissions to the medical ward are due to CVD.<sup>3</sup>  
14 Analysis results suggest that the curriculum has been impactful. Accordingly, 68% of the assessed  
15 curriculum had a moderate to large effect size indicating a noteworthy educational impact based  
16 on pre- and post-lecture assessments. When small effect sizes due to the Ceiling Effect are  
17 included, 80% of the curriculum demonstrates a positive trend in knowledge acquisition post-  
18 intervention. Furthermore, all participants completed the end of the year general assessment for  
19 which the overall rating of the curriculum was good to excellent.  
20  
21  
22

23  
24 The topics associated with moderate to large effect sizes included surgical appropriateness, critical  
25 care management, PAD, CHD and valvular heart disease. After completing the curriculum learning  
26 objectives, trainees felt more confident in their ability to identify indications for interventional  
27 procedures and surgical intervention for valvular disease and CHD. Trainees were also more  
28 confident in knowing when to appropriately refer patients to cardiovascular specialists for  
29 corrective interventions. Additionally, trainees demonstrated an improvement in the objective  
30 assessments of preoperative risk, medical management of valvular disease and critical care  
31 management. An improvement in the assessment scores of the aforementioned topics is important  
32 given the high prevalence of RHD and severe HF among patients admitted to HUM. Based on a  
33 study by Kwan et al. from 2016, 37% of all HUM admissions were for HF and more than 60% of  
34 HF patients were women.<sup>3</sup> Of those women with cardiomyopathy, 50% were diagnosed with  
35 PPCM.<sup>3</sup> Five percent of cardiovascular admissions were due to RHD with notable valvular disease  
36 identified by echocardiography.<sup>3</sup> Notably, although access to cardiac surgery is limited,  
37 organizations such as the Haiti Cardiac Alliance (HCA) work to facilitate surgical referrals and  
38 long-term follow up for cardiac surgery patients in Haiti.<sup>10</sup> Thus, educating GPs and internists on  
39 timely referral of cardiovascular patients to specialists and entities equipped to provide specialized  
40 care, as well as corrective interventions, can improve cardiovascular outcomes for patients with  
41 severe CVD in Haiti.  
42  
43  
44  
45  
46  
47  
48

49 The topics associated with a large proportion of the small effect sizes are shown in Figure 2. Many  
50 of the small effect sizes were explained by trainees' pre-existing medical knowledge and comfort  
51 with those topics. One reason that trainees may have scored highly on a number of the pre-  
52 assessments could be from prior exposure to these topics, before ICARDs-Haiti curriculum  
53 implementation. Additionally, trainees were not separated by their training year. Senior residents  
54  
55  
56  
57  
58  
59  
60



1  
2  
3 were likely to be more familiar with some of these topics than junior residents were, thereby,  
4 creating smaller effect sizes than if trainees had been separated by their training year. Four topics  
5 (shunt fraction, continuity equation comprehension, HF guideline-directed medical therapy, and  
6 Dopamine dosing) were associated with small negative effect sizes. All 4 of these assessments  
7 were objective and were taught only in English without French or Haitian Creole translation. Thus,  
8 the lack of a positive and moderate to large effect size for these topics is likely multifactorial and  
9 causality may include a lack of content clarity, topic complexity and language comprehension. A  
10 larger proportion of topics taught by multilingual lecturers with personal ties to Haiti, were  
11 associated with moderate to large effect sizes. Studies have demonstrated the effect of culture and  
12 language on online learning including how linguistic barriers and academic culture can negatively  
13 impact the academic success of non-English speakers.<sup>11,12</sup> This observation highlights the  
14 importance of not only language, but also cultural contextualization for learning.  
15  
16  
17  
18  
19

20 Specific considerations were made to ensure that the curriculum was applicable to providers  
21 practicing in Haiti. Health professionals from Haiti participated in the design, development and  
22 implementation of the curriculum. These collaborations enabled an understanding of specific  
23 resource limitations that were taken into account when creating the curriculum. The inclusion and  
24 active participation of Haitian health professionals reinforced culturally responsive teaching,  
25 which likely mitigated cultural barriers.<sup>13</sup> Their participation enabled a real-world application of  
26 the curriculum that helped to fill an educational void that hopefully also enhanced peer-to-peer  
27 education. Additionally, the prevalence of various cardiovascular diseases in Haiti was used to  
28 prioritize topics. Lastly, feedback from the residents was obtained to improve the quality and  
29 relevance of the curriculum content.  
30  
31  
32  
33  
34

35 Looking ahead, there are plans to modify the ICARDs curriculum to better address the educational  
36 needs in this region. Written or verbal French or Haitian Creole translation will be provided for  
37 all future lectures. For the topics associated with small effect sizes without the Ceiling Effect, these  
38 lectures will be restructured to improve clarity. For the topics associated with small effect sizes  
39 with the Ceiling Effect (implying that the trainees were already familiar with the topics), there will  
40 be a refocus of educational efforts on other higher yield topics. Learning objectives for various  
41 topics will be stratified by training year. To improve the objective assessment results, homework  
42 assignments which will be reviewed in smaller interactive summer sessions to support  
43 comprehension of complex topics. Drumford et. al., measured increased student engagement from  
44 collaborative team and seminar modalities in online learning, highlighting their import in the  
45 acquisition of group skills and needful student-faculty interactions.<sup>14</sup> To diversify the mode of  
46 curriculum delivery, we will include both synchronous and asynchronous educational content,  
47 modeling the flipped classroom approach which, when done correctly, has been proven to be an  
48 effective teaching methodology.<sup>15-17</sup> Additionally, other quantitatively proven methods for  
49 augmented remote learning such as discussion boards, chat rooms, and interactive guided problem  
50 solving are being explored for integration into the curriculum.<sup>14</sup> As per participant feedback,  
51  
52  
53  
54  
55  
56  
57  
58  
59  
60

1  
2  
3 hands-on experiences utilizing diagnostic tools for capacity building and skill development will  
4 be implemented. Additionally, residents will be followed longitudinally for 3 years into their first  
5 year of independent practice as internists to assess the longitudinal impact of the curriculum.  
6  
7

8 This pilot study was a success given the establishment of an international collaboration that  
9 succeeded in creating a dynamic curriculum that augmented cardiovascular education for IM  
10 trainees in Haiti. To improve the curriculum, the aforementioned changes will be made, and  
11 longitudinal impact will be measured. If there is a marked improvement, ICARDs will be expanded  
12 to additional sites to deliver much needed cardiovascular education to general practitioners, mid-  
13 level providers and internists in low resource settings.  
14  
15  
16

### 17 **Limitations:**

18 The current study is the first to describe and present data in support of the utilization of an adaptive  
19 international cardiology curriculum delivered via an interactive and dynamic virtual classroom in  
20 Haiti. However, the study has specific limitations. The small sample size is a limitation. Given  
21 the grassroots nature of ICARDs-Haiti, it was initially launched at one teaching hospital as a pilot  
22 program which limited the sample size. Additionally, only immediate pre- and post-assessment  
23 results were obtained. Thus, although knowledge acquisition was notable among the residents at  
24 HUM, the impact on long term knowledge retention remains unclear. Additionally, language  
25 differences were associated with lower assessment performance. This is supported by the fact that  
26 topics taught by multilingual lecturers were more likely to be associated with moderate to large  
27 effect sizes. The fact that trainees were not separated by their training year is another limitation  
28 of the study and likely led to smaller effect sizes. Lastly, although lecture materials were reviewed  
29 by the leadership council and although the diversity of the lecturer cohort was a strength of the  
30 curriculum, variability in lecture delivery and verbal communication may have impacted the effect  
31 size for certain topics.  
32  
33  
34  
35  
36  
37  
38

### 39 **Conclusion:**

40 The alarming increase in the global burden of CVD provides compelling evidence in support of  
41 prioritizing urgent, yet, carefully planned efforts to support cardiovascular medical education in  
42 LMICs such as Haiti. By utilizing a live, dynamic, and virtual classroom, this international  
43 cardiology curriculum demonstrated positive trends in knowledge acquisition through pre, post  
44 and end of the year assessments. This accomplishment is noteworthy given the grassroots effort  
45 among Haitian, American and French cardiology trainees and faculty to support cardiovascular  
46 educational capacity in one of the most under resourced countries in the world despite cultural and  
47 socio-economic barriers. Future directions of this experience will lend themselves towards  
48 improving the curriculum and standardizing a component of the lecture platform. This will allow  
49 for both synchronous and asynchronous educational development that can eventually be expanded  
50 to other resource limited settings that lack cardiology training programs and specialists. In the long  
51 run, the hope is that this will help to address global health disparities in cardiovascular education  
52  
53  
54  
55  
56  
57  
58  
59  
60

1  
2  
3 in resource-limited settings and serve as a valuable adjunct to onsite global health endeavors in the  
4 future.  
5  
6  
7

8 **Data Availability Statement:** The authors confirm that the data supporting the findings of this  
9 study are available within the article and in the uploaded supplementary information.  
10  
11  
12  
13

#### 14 **Figure Legends/Captions:**

##### 15 **Figure 1 Legend:**

16  
17  
18 Figure 1 shows the effect size proportionality for the entire ICARDs-Haiti curriculum. As shown  
19 above, 68% of the curriculum was associated with a moderate to large effect size. 12% of the  
20 curriculum was associated with a small effect size due to the Ceiling Effect while 20% of the  
21 curriculum was associated with a small effect size not attributable to the Ceiling Effect.  
22  
23  
24

##### 25 **Figure 2 Legend:**

26  
27 Figure 2 shows the proportion of topics associated with large, moderate, and small effect size. The  
28 majority of surgical appropriateness, critical care management, peripheral arterial disease, valvular  
29 disease and congenital heart disease were associated with medium to large effect sizes. The  
30 miscellaneous category (syncope and COVID-19) had an even split between small and moderate  
31 to large effect sizes. The majority of heart failure, echo and pharmacology were associated with  
32 small effect sizes with and without the Ceiling Effect.  
33  
34  
35  
36  
37  
38

##### 39 **Figure 3 Legend:**

40  
41 Figure 3 shows the association between monolingual English lecturers and effect size. 61% of the  
42 topics taught by monolingual English lecturers were associated with moderate to large effect sizes.  
43 24% of the topics taught by monolingual English lecturers were associated with small effect sizes  
44 not attributable to the Ceiling to Effect.  
45  
46  
47  
48  
49  
50  
51

##### 52 **Figure 4 Legend:**

53  
54 Figure 4 shows the association between multilingual lecturers and effect size. 77% of the topics  
55 taught by multilingual lecturers were associated with medium to large effect sizes. 14% of the  
56  
57  
58  
59  
60

1  
2  
3 topics taught by multilingual lecturers were associated with small effect sizes not attributable to  
4 the Ceiling Effect.  
5  
6  
7

## 8 9 **References:**

- 10  
11  
12 1. WHO | Noncommunicable diseases country profiles 2018.  
13 <https://www.who.int/nmh/countries/en/>. Accessed November 11, 2020.
- 14  
15 2. Davis MB, Arany Z, McNamara DM, Goland S, Elkayam U. Peripartum Cardiomyopathy:  
16 JACC State-of-the-Art Review. *J Am Coll Cardiol*. 2020;75(2):207-221.  
17 doi:10.1016/j.jacc.2019.11.014
- 18  
19 3. Kwan GF, Jean-Baptiste W, Cleophas P, et al. Descriptive epidemiology and short-term  
20 outcomes of heart failure hospitalisation in rural Haiti. *Heart*. 2016;102(2):140-146.  
21 doi:10.1136/heartjnl-2015-308451
- 22  
23 4. EMMUS VI Rapport de synthèse 2018 | UNICEF Haïti.  
24 <https://www.unicef.org/haiti/rapports/emmus-vi-rapport-de-synth%C3%A8se-2018>.  
25 Accessed August 25, 2020.
- 26  
27 5. Le Nouvelliste - Lueur d'espoir pour la cardiologie en Haïti.  
28 <https://lenouvelliste.com/article/104570/lueur-despoir-pour-la-cardiologie-en-haiti>.  
29 Accessed September 6, 2020.
- 30  
31 6. Ministère de la Santé Publique et de la Population.  
32 <https://mspp.gouv.ht/newsite/documentation.php?page=362&param1=valu1&param2=valu>  
33 [e2](https://mspp.gouv.ht/newsite/documentation.php?page=362&param1=valu1&param2=valu). Accessed September 7, 2020.
- 34  
35 7. University Hospital in Haiti Earns Global Accreditation as Teaching Institution | Partners  
36 In Health. [https://www.pih.org/article/university-hospital-haiti-earns-global-accreditation-](https://www.pih.org/article/university-hospital-haiti-earns-global-accreditation-teaching-institution)  
37 [teaching-institution](https://www.pih.org/article/university-hospital-haiti-earns-global-accreditation-teaching-institution). Accessed November 5, 2020.
- 38  
39 8. Patel SR, Margolies PJ, Covell NH, Lipscomb C, Dixon LB. Using Instructional Design,  
40 Analyze, Design, Develop, Implement, and Evaluate, to Develop e-Learning Modules to  
41 Disseminate Supported Employment for Community Behavioral Health Treatment  
42 Programs in New York State. *Front Public Health*. 2018;6:113.  
43 doi:10.3389/fpubh.2018.00113
- 44  
45 9. Fritz CO, Morris PE, Richler JJ. Effect size estimates: current use, calculations, and  
46 interpretation. *J Exp Psychol Gen*. 2012;141(1):2-18. doi:10.1037/a0024338
- 47  
48 10. Robinson O, Kwan GF, Romain J-L, Crapanzano M, Wilentz JR. A national coordinated  
49 cardiac surgery registry in Haiti: the Haiti cardiac alliance experience. *The Lancet Global*  
50 *Health*. 2016;4:S31. doi:10.1016/S2214-109X(16)30036-5
- 51  
52 11. Citation: Kang, Haijun (2014). Understanding online learning across cultures: The.
- 53  
54 12. Goodfellow R, Lea M, Gonzalez F, Mason R. Opportunity and e-quality: Intercultural and  
55 linguistic issues in global online learning. *Distance Education*. 2001;22(1):65-84.  
56 doi:10.1080/0158791010220105  
57  
58  
59  
60

13. Gay G. Preparing for Culturally Responsive Teaching. *Journal of Teacher Education*. 2002;53(2):106-116. doi:10.1177/0022487102053002003
14. Dumford AD, Miller AL. Online learning in higher education: exploring advantages and disadvantages for engagement. *J Comput High Educ*. 2018;30(3):1-14. doi:10.1007/s12528-018-9179-z
15. Narang A, Velagapudi P, Rajagopalan B, et al. A New Educational Framework to Improve Lifelong Learning for Cardiologists. *J Am Coll Cardiol*. 2018;71(4):454-462. doi:10.1016/j.jacc.2017.11.045
16. Burke AS, Fedorek B. Does “flipping” promote engagement?: A comparison of a traditional, online, and flipped class. *Active Learning in Higher Education*. 2017;18(1):11-24. doi:10.1177/1469787417693487
17. Lin H-C, Hwang G-J. Research trends of flipped classroom studies for medical courses: a review of journal publications from 2008 to 2017 based on the technology-enhanced learning model. *Interactive Learning Environments*. April 2018:1-17. doi:10.1080/10494820.2018.1467462

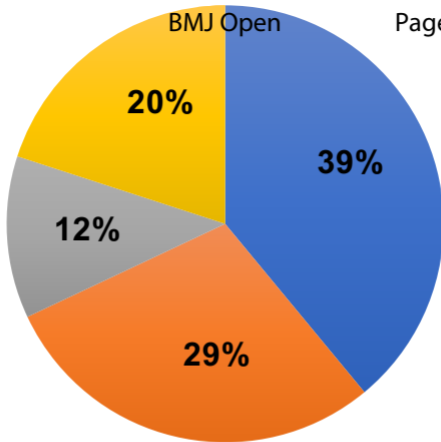

1  
2  
3  
4  
5  
6  
7  
8  
9  
10  
11  
12  
13  
14  
15  
16  
17  
18

■ Moderate effect size

■ Large effect size

■ Small Effect size with the Ceiling Effect

■ Small Effect size without the Ceiling Effect

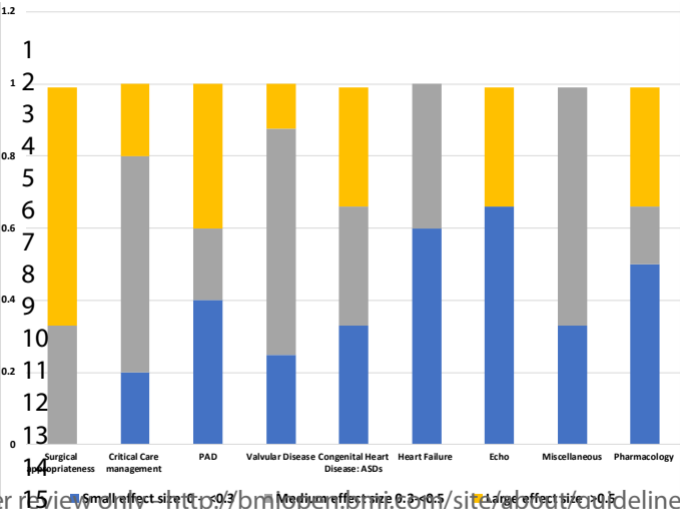

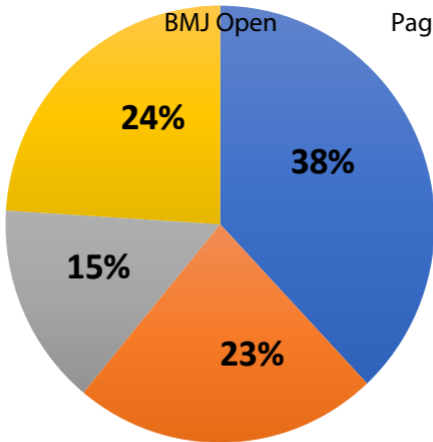

1  
2  
3  
4  
5  
6  
7  
8  
9  
10  
11  
12  
13  
14  
15  
16  
17  
18

■ Moderate effect size

■ Large effect size

■ Small Effect size with the Ceiling Effect

■ Small Effect size without the Ceiling Effect



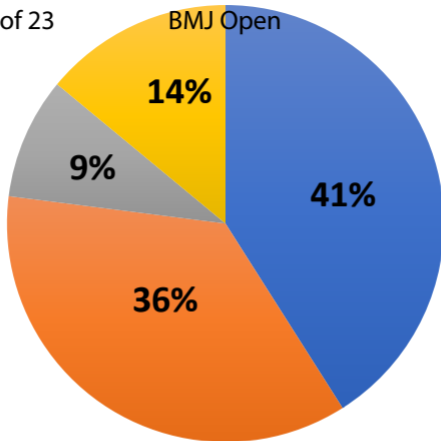

■ Moderate effect size

■ Large effect size

■ Small Effect size with the Ceiling Effect

■ Small Effect size without the Ceiling Effect

**Appendix Table 1**

Yellow=Large effect, Gray=Medium effect, Blue=Small Effect

\*Objective Assessments

|                                                                                          | Effect Size: |
|------------------------------------------------------------------------------------------|--------------|
| <b>Surgical appropriateness</b>                                                          |              |
| Knowing the criteria for ASD repair                                                      | 0.63         |
| Knowing when to refer patients with MS for corrective interventions                      | 0.57         |
| Familiarity with the Wilkins score                                                       | 0.36         |
| Knowing when to refer patients with MR for corrective intervention                       | 0.46         |
| knowing when to refer patients with AI to surgery                                        | 0.48         |
| comfort performing a pre-operative assessment                                            | 0.63         |
| Knowing which surgeries are considered low, intermediate and high risk                   | 0.52         |
| Ability to Identify appropriate work-up for low risk surgical candidates*                | 0.82         |
| Ability to identify appropriate work-up for high risk surgical candidate*                | 0.63         |
| <b>Critical Care management</b>                                                          |              |
| knowing the pathophysiology of cardiogenic shock                                         | 0.33         |
| comfort with the management of cardiogenic shock                                         | 0.48         |
| knowing the different types of mechanical assist devices used to treat cardiogenic shock | 0.34         |
| knowing the hemodynamics of cardiogenic shock                                            | 0.48         |
| Knowing when to refer patients for invasive hemodynamic monitoring (RHC)                 | 0.79         |
| Confidence in recognition of normal hemodynamic tracings                                 | 0.48         |
| Ability to identify the most appropriate management of cardiogenic shock*                | 0.26         |
| Ability to correlate a hemodynamic profile with the correct type of shock*               | 0.12         |
| Ability to identify the p/f ratio indicative of severe ARDS*                             | 0.56         |
| Ability to identify the most appropriate management for septic shock *                   | 0.48         |
| <b>PAD</b>                                                                               |              |
| comfort with managing PAD                                                                | 0.76         |
| Confidence in differentiating chronic from acute limb ischemia                           | 0.46         |
| familiarity with the risk factors for PAD                                                | 0.24         |
| Knowing how to measure an ABI                                                            | 0.52         |
| Ability to identify the normal ABI range *                                               | 0            |
| <b>Valvular Disease</b>                                                                  |              |

|    |                                                              |      |
|----|--------------------------------------------------------------|------|
| 1  |                                                              |      |
| 2  |                                                              |      |
| 3  | Comfort with the anatomy of the mitral valve                 | 0.4  |
| 4  | Comfort with the medical management of MR                    | 0.64 |
| 5  | Comfort identifying a MS murmur                              | 0.37 |
| 6  | Knowing the causes of mitral stenosis                        | 0.36 |
| 7  | Comfort with the management of MS                            | 0.34 |
| 8  | comfort with the management of AI                            | 0.21 |
| 9  | Ability to identify the correct description of an AS murmur* | 0.23 |
| 10 | Ability to identify the AVA for severe AS*                   | 0.49 |
| 11 |                                                              |      |
| 12 |                                                              |      |
| 13 |                                                              |      |
| 14 |                                                              |      |

### Congenital Heart Disease: ASDs

|    |                                                                                 |      |
|----|---------------------------------------------------------------------------------|------|
| 15 |                                                                                 |      |
| 16 |                                                                                 |      |
| 17 | Comfort quantifying a cardiac shunt using the Qp/Qs equation                    | 0.6  |
| 18 | Knowing the different types of ASDs                                             | 0.58 |
| 19 | Ability to identify the EKG finding commonly associated with an ASD*            | 0.49 |
| 20 | Ability to identify cardiac defects frequently seen with ASDs*                  | 0.34 |
| 21 | Ability to identify structural abnormalities associated with longstanding ASDs* | 0.13 |
| 22 | Ability to correctly identify a hemodynamically significant Qp:Qs ratio*        | 0.23 |
| 23 |                                                                                 |      |
| 24 |                                                                                 |      |
| 25 |                                                                                 |      |

### Heart Failure

|    |                                            |      |
|----|--------------------------------------------|------|
| 26 |                                            |      |
| 27 | Comprehension of HF pathophysiology        | 0.39 |
| 28 | Comfort with interpretation of the HF exam | 0.38 |
| 29 | Knowing GDMT for HF                        | 0.27 |
| 30 | Comfort performing a H&P on a HF patient   | 0.15 |
| 31 | Ability to identify GDMT*                  | 0.02 |
| 32 |                                            |      |
| 33 |                                            |      |

### Echo

|    |                                                             |      |
|----|-------------------------------------------------------------|------|
| 34 |                                                             |      |
| 35 | Comfort identifying standard echocardiography views         | 0.13 |
| 36 | Demonstrating an understanding of the continuity equation * | 0.11 |
| 37 | Ability to calculate AVA based on echo parameters*          | 0.54 |
| 38 |                                                             |      |
| 39 |                                                             |      |

### Miscellaneous

|    |                                                                          |      |
|----|--------------------------------------------------------------------------|------|
| 40 |                                                                          |      |
| 41 |                                                                          |      |
| 42 |                                                                          |      |
| 43 | Knowing the differential diagnosis for syncope                           | 0.4  |
| 44 | Knowing the work-up for syncope                                          | 0.39 |
| 45 | Ability to identify COVID-19 cardiac complications*                      | 0.24 |
| 46 | Ability to correctly identify a common provocation of vasovagal syncope* | 0.19 |
| 47 |                                                                          |      |
| 48 |                                                                          |      |
| 49 |                                                                          |      |

### Pharmacology

|    |                                                                        |      |
|----|------------------------------------------------------------------------|------|
| 50 |                                                                        |      |
| 51 | Ability to identify the mechanism by which Digoxin decreases HR*       | 0.37 |
| 52 | Ability to identify the mechanism of action of Nipride *               | 0.57 |
| 53 | Ability to identify how dopamine is cleared*                           | 0.73 |
| 54 | Ability to identify appropriate dopamine dosing for cardiogenic shock* | 0.19 |
| 55 |                                                                        |      |
| 56 |                                                                        |      |
| 57 |                                                                        |      |
| 58 |                                                                        |      |
| 59 |                                                                        |      |

|    |                                                            |      |
|----|------------------------------------------------------------|------|
| 1  |                                                            |      |
| 2  |                                                            |      |
| 3  |                                                            |      |
| 4  | Ability to identify the mechanism of action of milrinone * | 0.16 |
| 5  | Ability to identify the mechanism of action of Dobutamine* | 0.26 |
| 6  |                                                            |      |
| 7  |                                                            |      |
| 8  |                                                            |      |
| 9  |                                                            |      |
| 10 |                                                            |      |
| 11 |                                                            |      |
| 12 |                                                            |      |
| 13 |                                                            |      |
| 14 | <hr/>                                                      |      |
| 15 |                                                            |      |

16 **Sample Subjective Assessment Question with Associated Answer choices:**

- 17
- 18 1. I know when to refer a patient with mitral stenosis for corrective intervention
- 19 A. Strongly Agree
- 20 B. Agree
- 21 C. Neither agree nor Disagree
- 22 D. Disagree
- 23 E. Strongly Disagree
- 24
- 25
- 26

27 **Sample Objective Assessment Question with Associated Answer choices:**

- 28
- 29 2. What echocardiography finding would you expect to see with a longstanding ASD?
- 30 A. Hypertrophied RV
- 31 B. Dilated LV
- 32 C. Hypertrophied LV
- 33 D. Dilated RV
- 34
- 35
- 36
- 37
- 
- 38
- 39
- 40
- 41
- 42
- 43
- 44
- 45
- 46
- 47
- 48
- 49
- 50
- 51
- 52
- 53
- 54
- 55
- 56
- 57
- 58
- 59
- 60

Appendix Table 2

| Objective Assessments Associated with small effect sizes <0.3                                             | Percent of trainees who answered objective questions correctly pre-intervention | Percent of trainees who answered objective questions correctly post-intervention | Presence of the Ceiling Effect | Fluency of the lecturers |
|-----------------------------------------------------------------------------------------------------------|---------------------------------------------------------------------------------|----------------------------------------------------------------------------------|--------------------------------|--------------------------|
| Correctly identifying a common cause of vasovagal syncope                                                 | 30%                                                                             | 50%                                                                              | No                             | Multilingual             |
| Correctly identifying COVID-19 cardiac complications                                                      | 86%                                                                             | 100%                                                                             | Yes                            | English, Monolingual     |
| Correctly identifying the mechanism of action of Dobutamine                                               | 63%                                                                             | 88%                                                                              | No                             | English, Monolingual     |
| Correctly identifying the characteristics of an aortic stenosis murmur                                    | 86%                                                                             | 100%                                                                             | Yes                            | English, Monolingual     |
| Correctly identifying a normal ankle brachial index range                                                 | 100%                                                                            | 100%                                                                             | Yes                            | Multilingual             |
| Correctly identifying the mechanism of action of Milrinone                                                | 57%                                                                             | 75%                                                                              | No                             | Multilingual             |
| Correctly identifying cardiogenic shock based on hemodynamic profile                                      | 57%                                                                             | 71%                                                                              | No                             | Multilingual             |
| Correctly identifying the most appropriate management of cardiogenic shock based on clinical presentation | 29%                                                                             | 54%                                                                              | No                             | English, Monolingual     |
| Correctly identifying structural abnormalities associated with a longstanding atrial septal defect        | 70%                                                                             | 83%                                                                              | No                             | English, Monolingual     |

|    |                                                                               |                                                                                                           |                                                                                                            |                                |                         |
|----|-------------------------------------------------------------------------------|-----------------------------------------------------------------------------------------------------------|------------------------------------------------------------------------------------------------------------|--------------------------------|-------------------------|
| 1  | Correctly identifying a hemodynamically significant Qp:Qs ratio*              | 60%                                                                                                       | 33%                                                                                                        | No                             | English, Monolingual    |
| 2  | Correctly identifying all heart failure guideline directed medical therapies* | 77%                                                                                                       | 75%                                                                                                        | No                             | English, Monolingual    |
| 3  | Correctly dosing Dopamine for cardiogenic shock *                             | 71%                                                                                                       | 50%                                                                                                        | No                             | English, Monolingual    |
| 4  | Correctly identifying the definition of the continuity equation *             | 83%                                                                                                       | 71%                                                                                                        | No                             | English, Monolingual    |
| 5  |                                                                               |                                                                                                           |                                                                                                            |                                |                         |
| 6  | Subjective Confidence assessments associated with small effect sizes <0.3     | Percent of trainees who were either comfortable or very comfortable on the rating scales pre-intervention | Percent of trainees who were either comfortable or very comfortable on the rating scales post-intervention | Presence of the Ceiling Effect | Fluency of the Lectures |
| 7  | Comfort with guideline directed medical therapy for heart failure             | 100%                                                                                                      | 100%                                                                                                       | Yes                            | English, Monolingual    |
| 8  | Comfort with performing a heart failure history and physical exam             | 100%                                                                                                      | 100%                                                                                                       | Yes                            | English, Monolingual    |
| 9  | Comfort with identifying standard echo views                                  | 100%                                                                                                      | 100%                                                                                                       | Yes                            | English, Monolingual    |
| 10 | Comfort identifying risk factors for peripheral arterial disease              | 83.30%                                                                                                    | 100%                                                                                                       | Yes                            | Multilingual            |
| 11 | Comfort managing aortic insufficiency                                         | 50%                                                                                                       | 85.70%                                                                                                     | No                             | English, Monolingual    |

\*Negative small effect sizes
