# Supplementary material for: Implementation of a virtual international cardiology curriculum to address the deficit of cardiovascular education in Haiti: a pilot study
Source: PubMed Central journal article supplement — BMJ Open. 2021 Jun 21;11(6):e048690. doi: 10.1136/bmjopen-2021-048690 (PMC8217944; doi:10.1136/bmjopen-2021-048690), 2021-06-21
Supplement: bmjopen-2021-048690supp001.pdf [file bmjopen-2021-048690supp001.pdf]

**Appendix Table 1**

Yellow=Large effect, Gray=Medium effect, Blue=Small Effect

\*Objective Assessments

|                                                                                          | Effect Size: |
|------------------------------------------------------------------------------------------|--------------|
| <b>Surgical appropriateness</b>                                                          |              |
| Knowing the criteria for ASD repair                                                      | 0.63         |
| Knowing when to refer patients with MS for corrective interventions                      | 0.57         |
| Familiarity with the Wilkins score                                                       | 0.36         |
| Knowing when to refer patients with MR for corrective intervention                       | 0.46         |
| knowing when to refer patients with AI to surgery                                        | 0.48         |
| comfort performing a pre-operative assessment                                            | 0.63         |
| Knowing which surgeries are considered low, intermediate and high risk                   | 0.52         |
| Ability to Identify appropriate work-up for low risk surgical candidates*                | 0.82         |
| Ability to identify appropriate work-up for high risk surgical candidate*                | 0.63         |
| <b>Critical Care management</b>                                                          |              |
| knowing the pathophysiology of cardiogenic shock                                         | 0.33         |
| comfort with the management of cardiogenic shock                                         | 0.48         |
| knowing the different types of mechanical assist devices used to treat cardiogenic shock | 0.34         |
| knowing the hemodynamics of cardiogenic shock                                            | 0.48         |
| Knowing when to refer patients for invasive hemodynamic monitoring (RHC)                 | 0.79         |
| Confidence in recognition of normal hemodynamic tracings                                 | 0.48         |
| Ability to identify the most appropriate management of cardiogenic shock*                | 0.26         |
| Ability to correlate a hemodynamic profile with the correct type of shock*               | 0.12         |
| Ability to identify the p/f ratio indicative of severe ARDS*                             | 0.56         |
| Ability to identify the most appropriate management for septic shock *                   | 0.48         |
| <b>PAD</b>                                                                               |              |
| comfort with managing PAD                                                                | 0.76         |
| Confidence in differentiating chronic from acute limb ischemia                           | 0.46         |
| familiarity with the risk factors for PAD                                                | 0.24         |
| Knowing how to measure an ABI                                                            | 0.52         |
| Ability to identify the normal ABI range *                                               | 0            |
| <b>Valvular Disease</b>                                                                  |              |

|                                                                                 |      |
|---------------------------------------------------------------------------------|------|
| Comfort with the anatomy of the mitral valve                                    | 0.4  |
| Comfort with the medical management of MR                                       | 0.64 |
| Comfort identifying a MS murmur                                                 | 0.37 |
| Knowing the causes of mitral stenosis                                           | 0.36 |
| Comfort with the management of MS                                               | 0.34 |
| comfort with the management of AI                                               | 0.21 |
| Ability to identify the correct description of an AS murmur*                    | 0.23 |
| Ability to identify the AVA for severe AS*                                      | 0.49 |
| <b>Congenital Heart Disease: ASDs</b>                                           |      |
| Comfort quantifying a cardiac shunt using the Qp/Qs equation                    | 0.6  |
| Knowing the different types of ASDs                                             | 0.58 |
| Ability to identify the EKG finding commonly associated with an ASD*            | 0.49 |
| Ability to identify cardiac defects frequently seen with ASDs*                  | 0.34 |
| Ability to identify structural abnormalities associated with longstanding ASDs* | 0.13 |
| Ability to correctly identify a hemodynamically significant Qp:Qs ratio*        | 0.23 |
| <b>Heart Failure</b>                                                            |      |
| Comprehension of HF pathophysiology                                             | 0.39 |
| Comfort with interpretation of the HF exam                                      | 0.38 |
| Knowing GDMT for HF                                                             | 0.27 |
| Comfort performing a H&P on a HF patient                                        | 0.15 |
| Ability to identify GDMT*                                                       | 0.02 |
| <b>Echo</b>                                                                     |      |
| Comfort identifying standard echocardiography views                             | 0.13 |
| Demonstrating an understanding of the continuity equation *                     | 0.11 |
| Ability to calculate AVA based on echo parameters*                              | 0.54 |
| <b>Miscellaneous</b>                                                            |      |
| Knowing the differential diagnosis for syncope                                  | 0.4  |
| Knowing the work-up for syncope                                                 | 0.39 |
| Ability to identify COVID-19 cardiac complications*                             | 0.24 |
| Ability to correctly identify a common provocation of vasovagal syncope*        | 0.19 |
| <b>Pharmacology</b>                                                             |      |
| Ability to identify the mechanism by which Digoxin decreases HR*                | 0.37 |
| Ability to identify the mechanism of action of Nipride *                        | 0.57 |
| Ability to identify how dopamine is cleared*                                    | 0.73 |
| Ability to identify appropriate dopamine dosing for cardiogenic shock*          | 0.19 |

|                                                            |      |
|------------------------------------------------------------|------|
| Ability to identify the mechanism of action of milrinone * | 0.16 |
| Ability to identify the mechanism of action of Dobutamine* | 0.26 |

---

**Sample Subjective Assessment Question with Associated Answer choices:**

1. I know when to refer a patient with mitral stenosis for corrective intervention
  - A. Strongly Agree
  - B. Agree
  - C. Neither agree nor Disagree
  - D. Disagree
  - E. Strongly Disagree

**Sample Objective Assessment Question with Associated Answer choices:**

2. What echocardiography finding would you expect to see with a longstanding ASD?
    - A. Hypertrophied RV
    - B. Dilated LV
    - C. Hypertrophied LV
    - D. Dilated RV
-
