# Supplementary material for: Implementation of a virtual international cardiology curriculum to address the deficit of cardiovascular education in Haiti: a pilot study
Source: PubMed Central journal article supplement — BMJ Open. 2021 Jun 21;11(6):e048690. doi: 10.1136/bmjopen-2021-048690 (PMC8217944; doi:10.1136/bmjopen-2021-048690), 2021-06-21
Supplement: bmjopen-2021-048690supp002.pdf [file bmjopen-2021-048690supp002.pdf]

Appendix Table 2

| Objective Assessments Associated with small effect sizes <0.3                                             | Percent of trainees who answered objective questions correctly pre-intervention | Percent of trainees who answered objective questions correctly post-intervention | Presence of the Ceiling Effect | Fluency of the lecturers |
|-----------------------------------------------------------------------------------------------------------|---------------------------------------------------------------------------------|----------------------------------------------------------------------------------|--------------------------------|--------------------------|
| Correctly identifying a common cause of vasovagal syncope                                                 | 30%                                                                             | 50%                                                                              | No                             | Multilingual             |
| Correctly identifying COVID-19 cardiac complications                                                      | 86%                                                                             | 100%                                                                             | Yes                            | English, Monolingual     |
| Correctly identifying the mechanism of action of Dobutamine                                               | 63%                                                                             | 88%                                                                              | No                             | English, Monolingual     |
| Correctly identifying the characteristics of an aortic stenosis murmur                                    | 86%                                                                             | 100%                                                                             | Yes                            | English, Monolingual     |
| Correctly identifying a normal ankle brachial index range                                                 | 100%                                                                            | 100%                                                                             | Yes                            | Multilingual             |
| Correctly identifying the mechanism of action of Milrinone                                                | 57%                                                                             | 75%                                                                              | No                             | Multilingual             |
| Correctly identifying cardiogenic shock based on hemodynamic profile                                      | 57%                                                                             | 71%                                                                              | No                             | Multilingual             |
| Correctly identifying the most appropriate management of cardiogenic shock based on clinical presentation | 29%                                                                             | 54%                                                                              | No                             | English, Monolingual     |
| Correctly identifying structural abnormalities associated with a longstanding atrial septal defect        | 70%                                                                             | 83%                                                                              | No                             | English, Monolingual     |

|                                                                               |                                                                                                           |                                                                                                            |                                |                         |
|-------------------------------------------------------------------------------|-----------------------------------------------------------------------------------------------------------|------------------------------------------------------------------------------------------------------------|--------------------------------|-------------------------|
| Correctly identifying a hemodynamically significant Qp:Qs ratio*              | 60%                                                                                                       | 33%                                                                                                        | No                             | English, Monolingual    |
| Correctly identifying all heart failure guideline directed medical therapies* | 77%                                                                                                       | 75%                                                                                                        | No                             | English, Monolingual    |
| Correctly dosing Dopamine for cardiogenic shock *                             | 71%                                                                                                       | 50%                                                                                                        | No                             | English, Monolingual    |
| Correctly identifying the definition of the continuity equation *             | 83%                                                                                                       | 71%                                                                                                        | No                             | English, Monolingual    |
| Subjective Confidence assessments associated with small effect sizes <0.3     | Percent of trainees who were either comfortable or very comfortable on the rating scales pre-intervention | Percent of trainees who were either comfortable or very comfortable on the rating scales post-intervention | Presence of the Ceiling Effect | Fluency of the Lectures |
| Comfort with guideline directed medical therapy for heart failure             | 100%                                                                                                      | 100%                                                                                                       | Yes                            | English, Monolingual    |
| Comfort with performing a heart failure history and physical exam             | 100%                                                                                                      | 100%                                                                                                       | Yes                            | English, Monolingual    |
| Comfort with identifying standard echo views                                  | 100%                                                                                                      | 100%                                                                                                       | Yes                            | English, Monolingual    |
| Comfort identifying risk factors for peripheral arterial disease              | 83.30%                                                                                                    | 100%                                                                                                       | Yes                            | Multilingual            |
| Comfort managing aortic insufficiency                                         | 50%                                                                                                       | 85.70%                                                                                                     | No                             | English, Monolingual    |

\*Negative small effect sizes
